# Supplementary material for: Anticancer Cytotoxic Activity of Bispidine Derivatives Associated with the Increasing Catabolism of Polyamines
Source: MDPI journal article supplement (doi:10.3390/molecules27123872), 2022-06-16
Supplement: s1 [file s1]

# Anticancer Cytotoxic Activity of Bispidine Derivatives Associated with the Increasing Catabolism of Polyamines

Ekaterina V. Neborak <sup>1,\*</sup>, Altynay B. Kaldybayeva <sup>2,3</sup>, Lylia Bey <sup>1</sup>, Aigul Y. Malmakova <sup>2</sup>, Anna S. Tveritinova <sup>1</sup>, Abdullah Hilal <sup>1,4</sup>, Valentina K. Yu <sup>2</sup>, Maria V. Ploskonos <sup>5</sup>, Marina V. Komarova <sup>6</sup>, Enzo Agostinelli <sup>7,8</sup> and Dmitry D. Zhdanov <sup>1,4,\*</sup>

<sup>1</sup> Department of Biochemistry, Peoples' Friendship University of Russia (RUDN University), 8 Miklukho-Maklaya St., Moscow, 117198, Russian Federation, neborak\_ev@pfur.ru, katevladis@mail.ru

<sup>2</sup> A.B. Bekturov Institute of Chemical Sciences, Laboratory of Chemistry of Synthetic and Natural Medicinal Substances, Almaty, Kazakhstan, malmakova@mail.ru, altin\_28.94@mail.ru, yu\_vk@mail.ru

<sup>3</sup> Al-Farabi Kazakh National University, Almaty, Kazakhstan, altin\_28.94@mail.ru

<sup>4</sup> Institute of Biomedical Chemistry, 10/8 Pogodinskaya St., 119121, Moscow, Russia, zhdanovdd@mail.ru

<sup>5</sup> Astrakhan State Medical University of The Healthcare Ministry of Russian Federation, Astrakhan 414000, Russian Federation, ploskonoz@mail.ru

<sup>6</sup> Samara University, Moskovskoye Sh., 34, 443086, Samara, Russian Federation, marinakom@yandex.ru

<sup>7</sup> Department of Sense Organs, Faculty of Medicine and Dentistry, SAPIENZA University of Rome, University Hospital Policlinico Umberto I, I-00161 Rome, Italy, enzo.agostinelli@uniroma1.it

<sup>8</sup> International Polyamines Foundation, ETS-ONLUS, I-00159 Rome, Italy, enzo.agostinelli@uniroma1.it

\* Correspondence: [neborak\\_ev@pfur.ru](mailto:neborak_ev@pfur.ru), [katevladis@mail.ru](mailto:katevladis@mail.ru); [zhdanovdd@mail.ru](mailto:zhdanovdd@mail.ru)

## Supplementary Material

Spectral NMR data section .....Figures S2–S8

Spectral IR data section.....Figures S9–S21

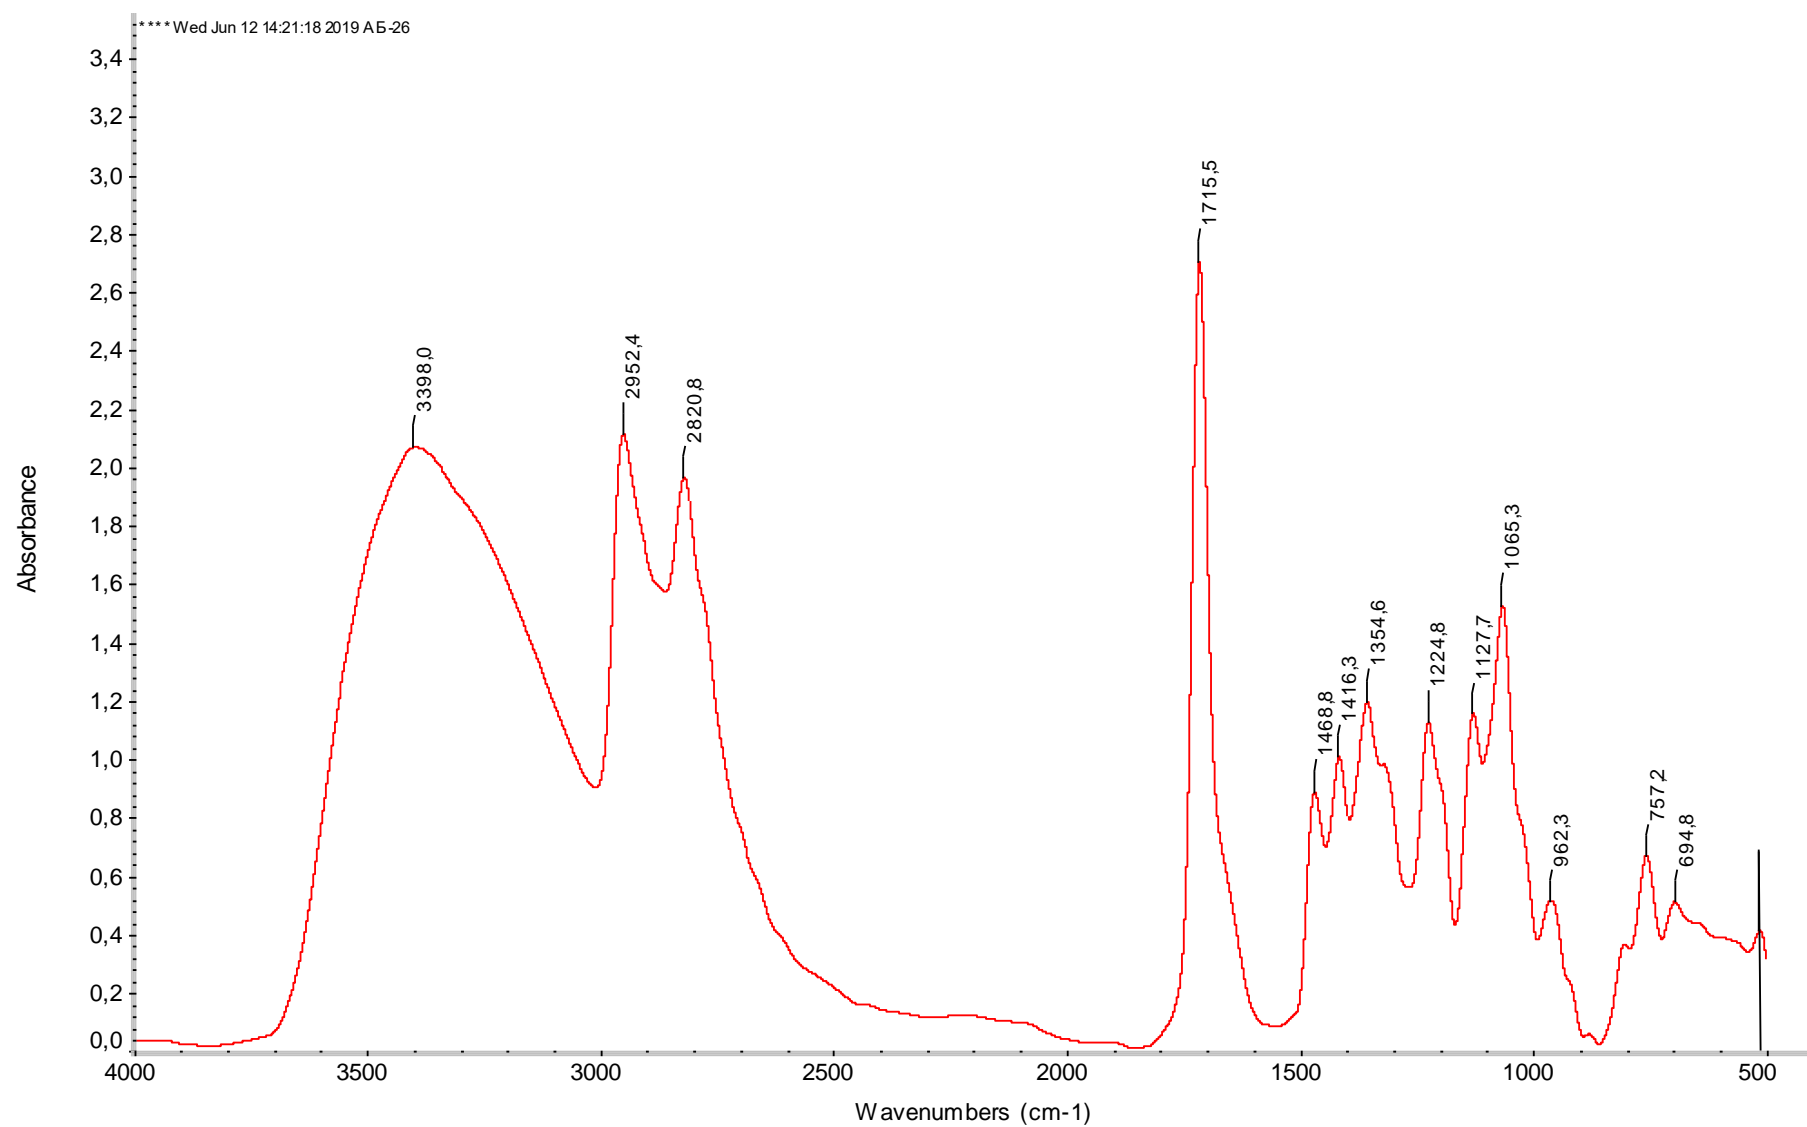

**Figure S1.** IR spectrum of 1-(3-hydroxypropyl)piperidin-4-one (1 b)

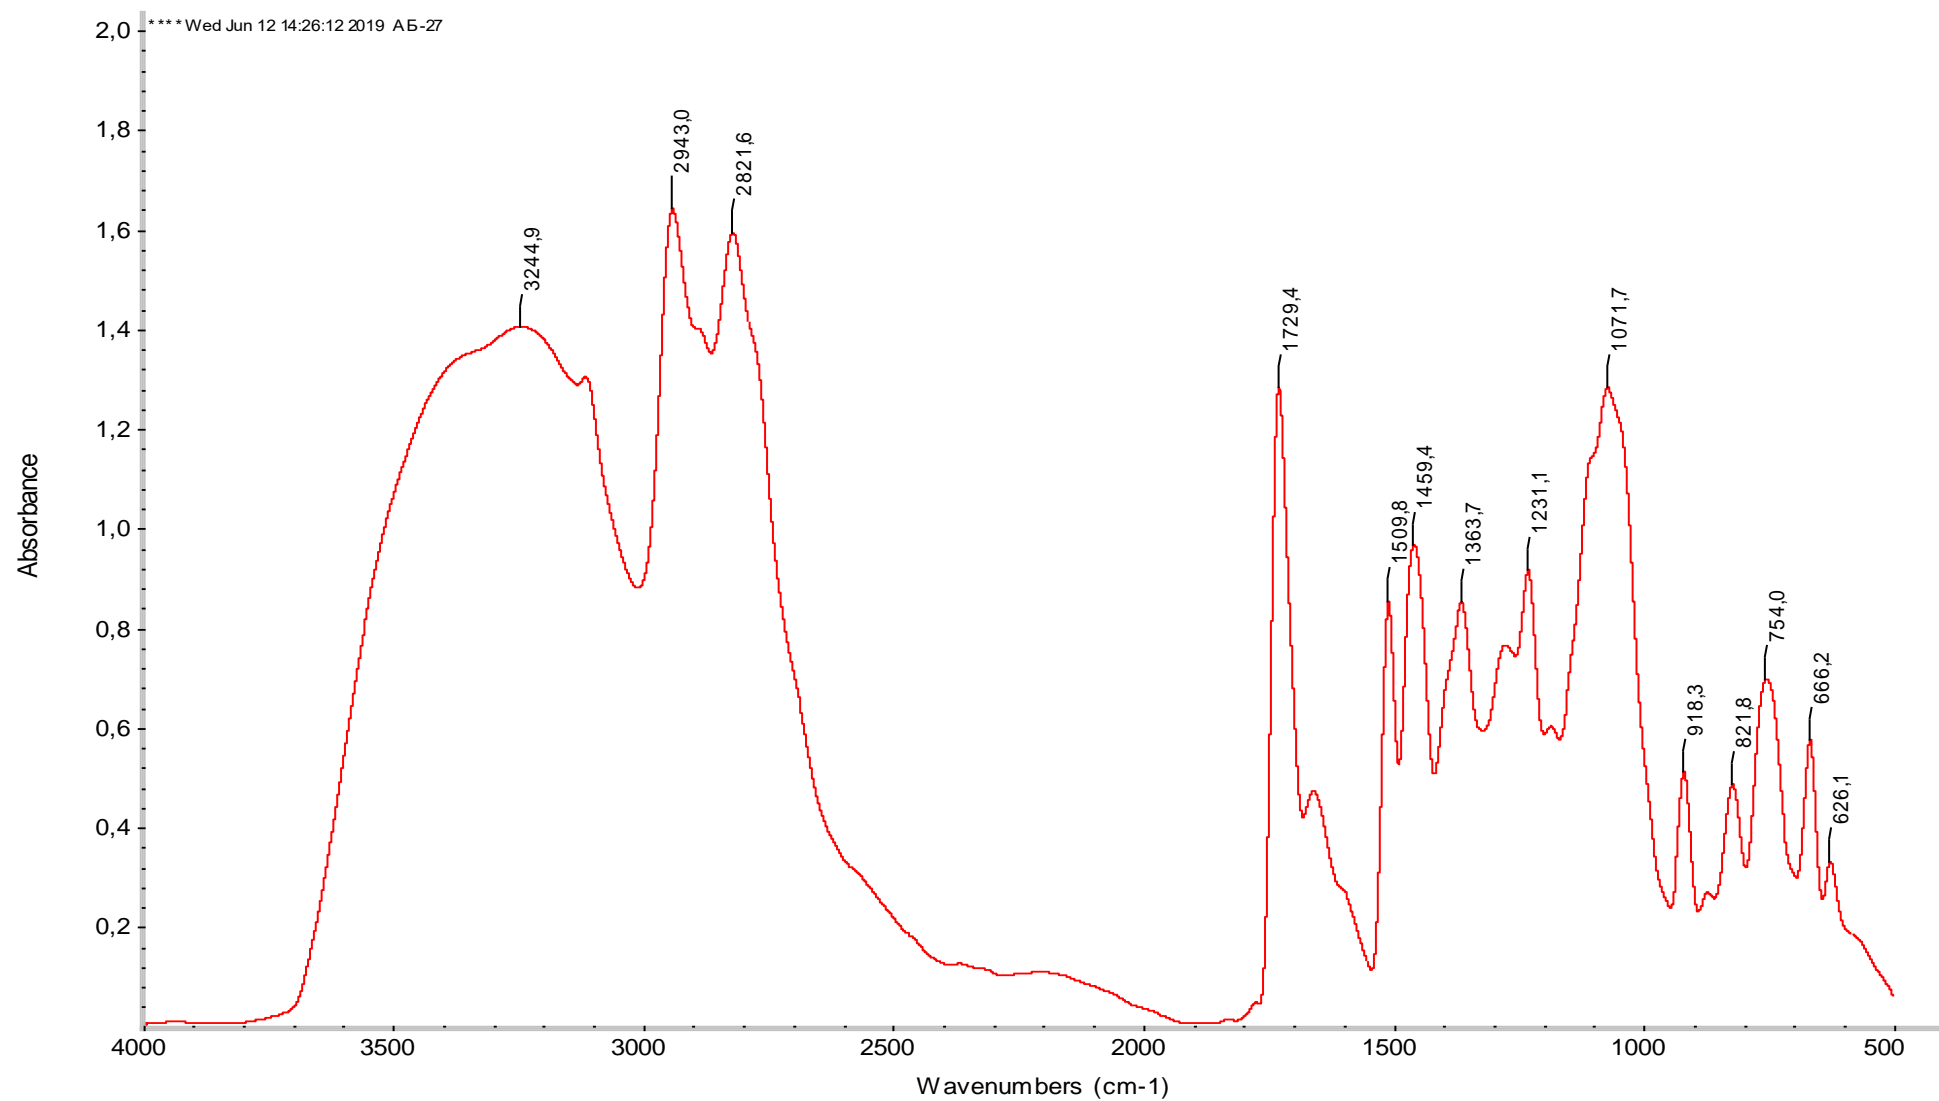

**Figure S2.** IR spectrum of 3-(3-hydroxypropyl)-7-[3-(1*H*-imidazol-1-yl)propyl]-3,7-diazabicyclo[3.3.1]nonan-9-one (2b)

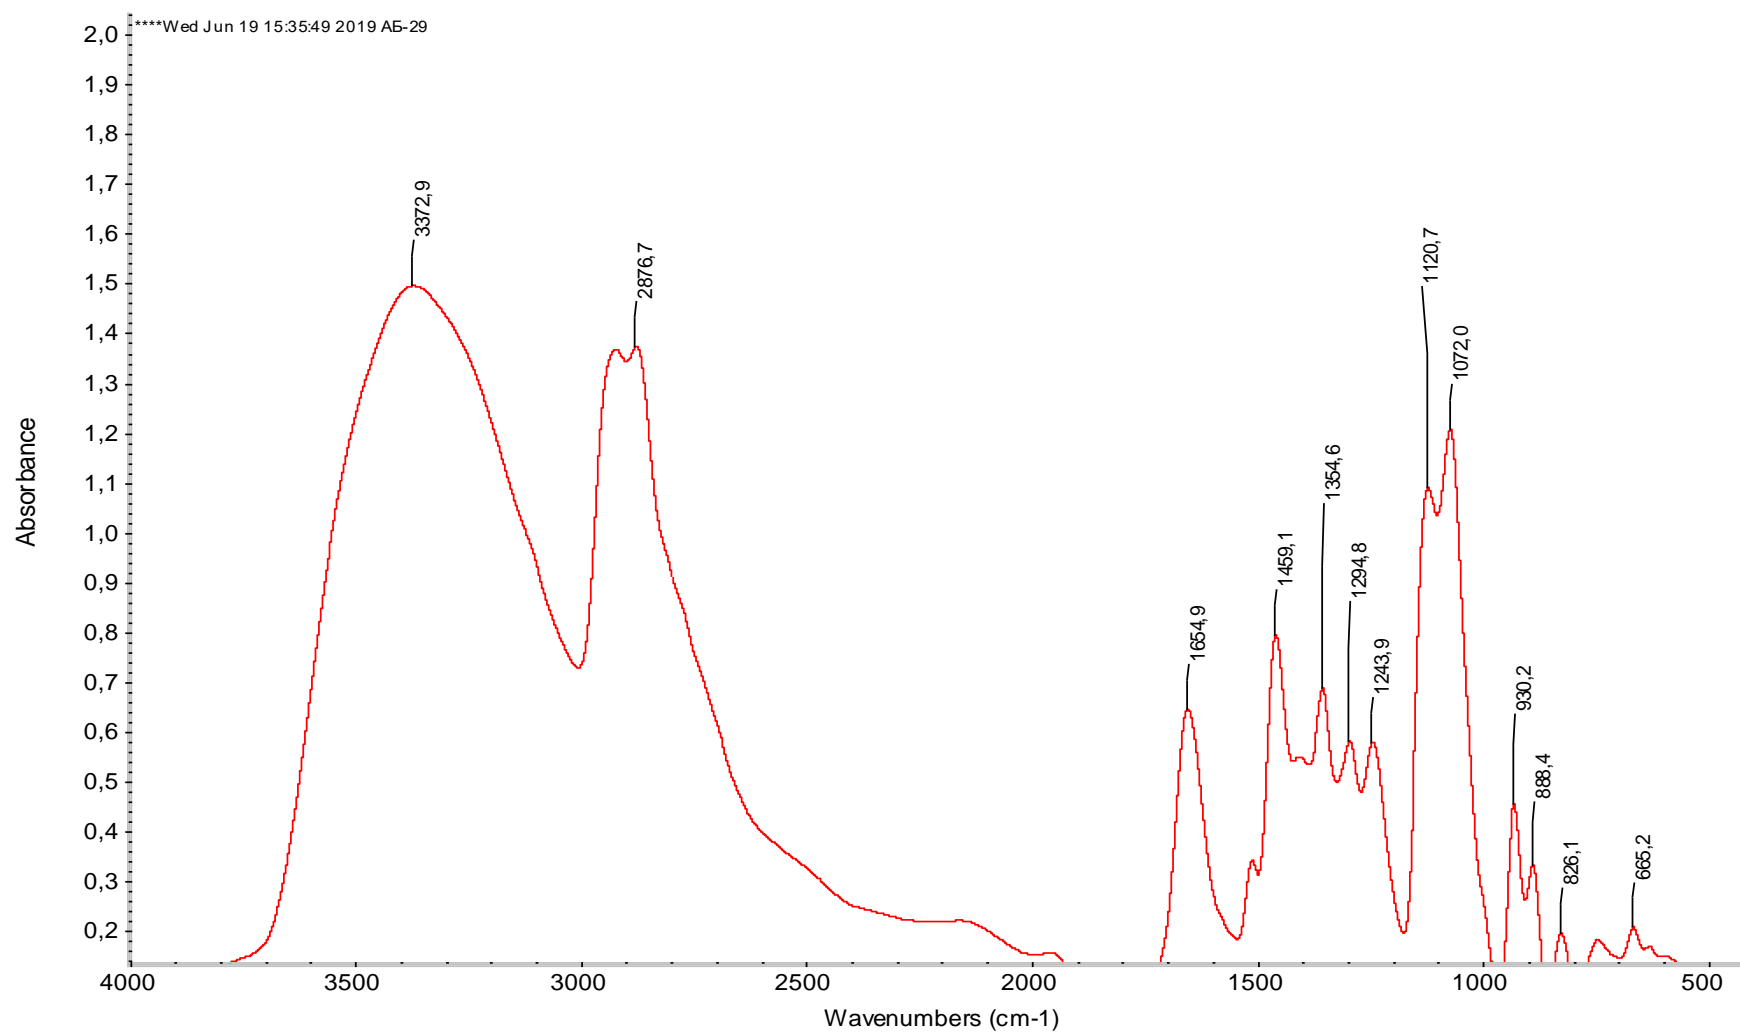

**Figure S3.** IR spectrum of 3-(3-hydroxypropyl)-7-[3-(1*H*-imidazol-1-yl)propyl]-3,7-diazabicyclo[3.3.1]nonane (3b)

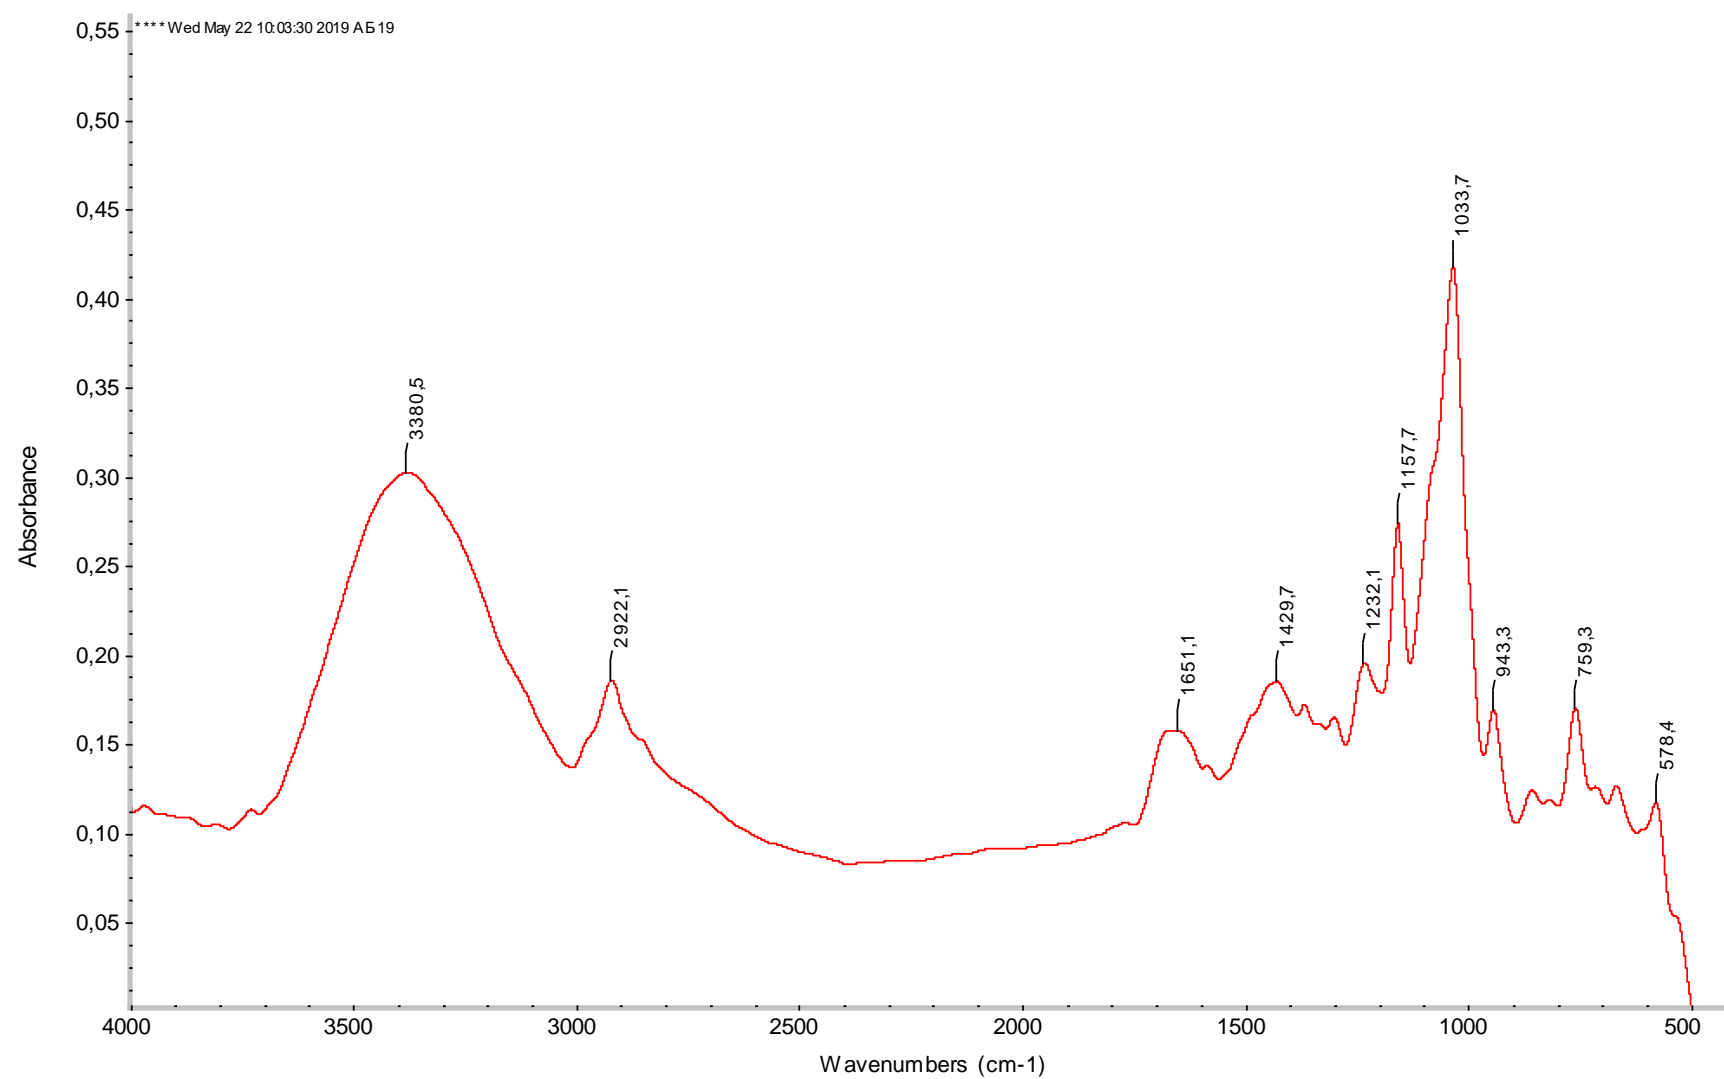

**Figure S4.** IR spectrum of oxime 3-Boc-7-[3-(1*H*-imidazol-1-yl)propyl]-3,7-diazabicyclo[3.3.1]nonan-9-one (5a)

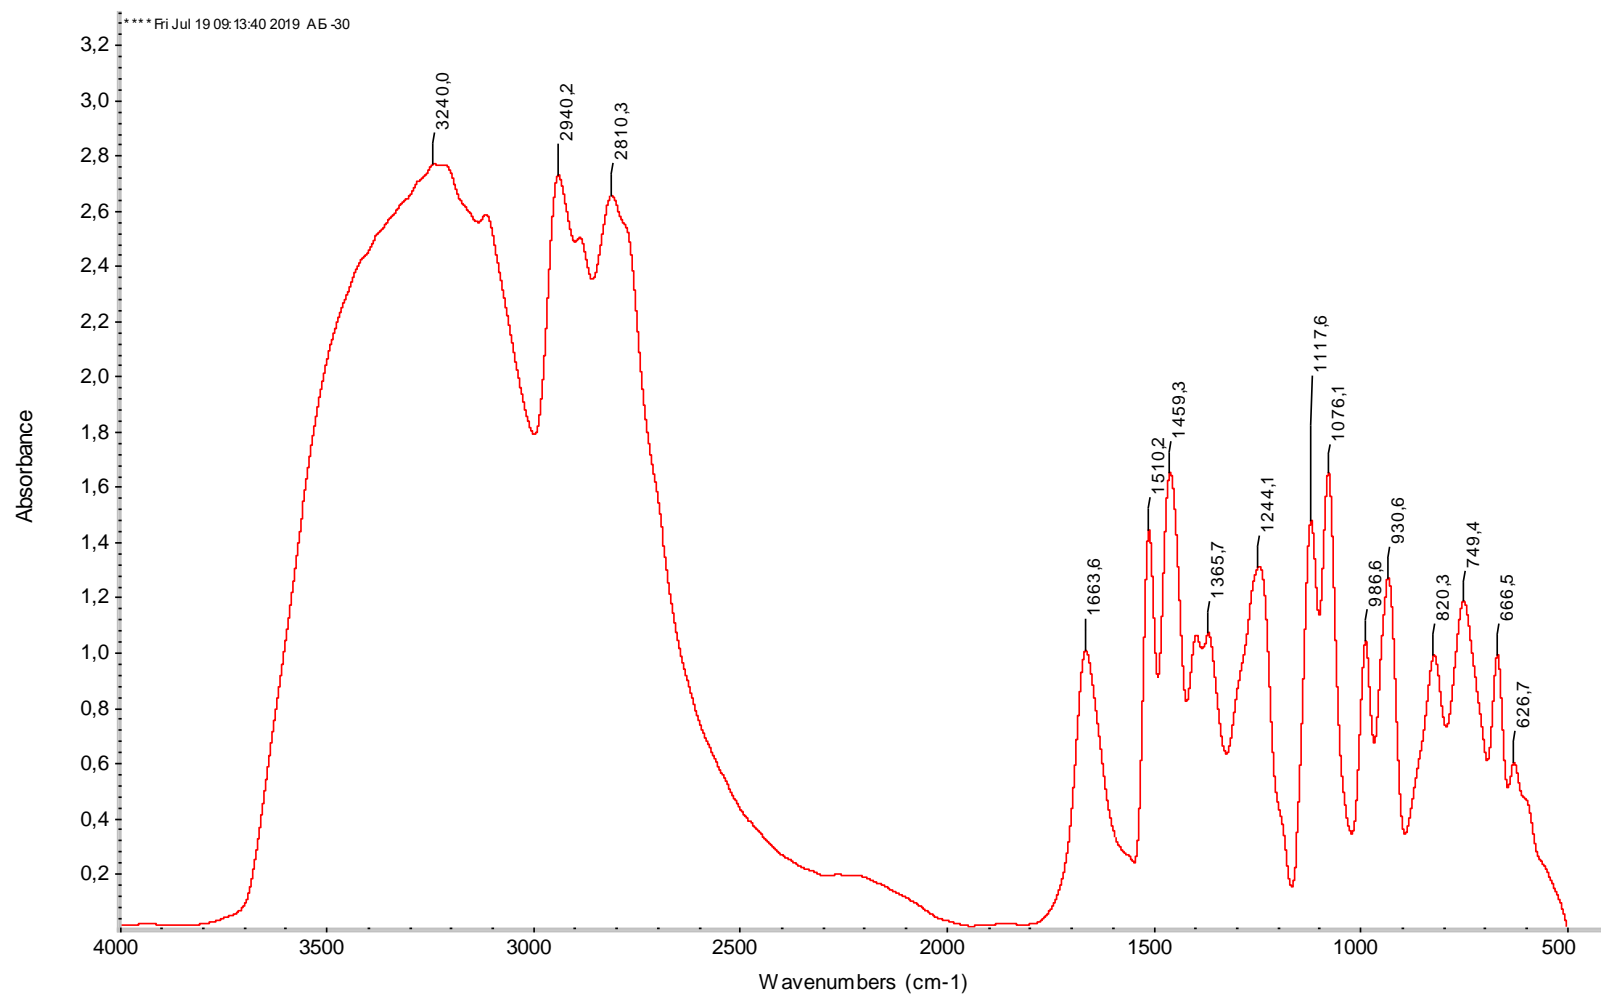

**Figure S5.** IR spectrum of oxime of 3-(3-hydroxypropyl)-7-[3-(1*H*-imidazol-1-yl)propyl]-3,7-diazabicyclo[3.3.1]nonan-9-one (5b)

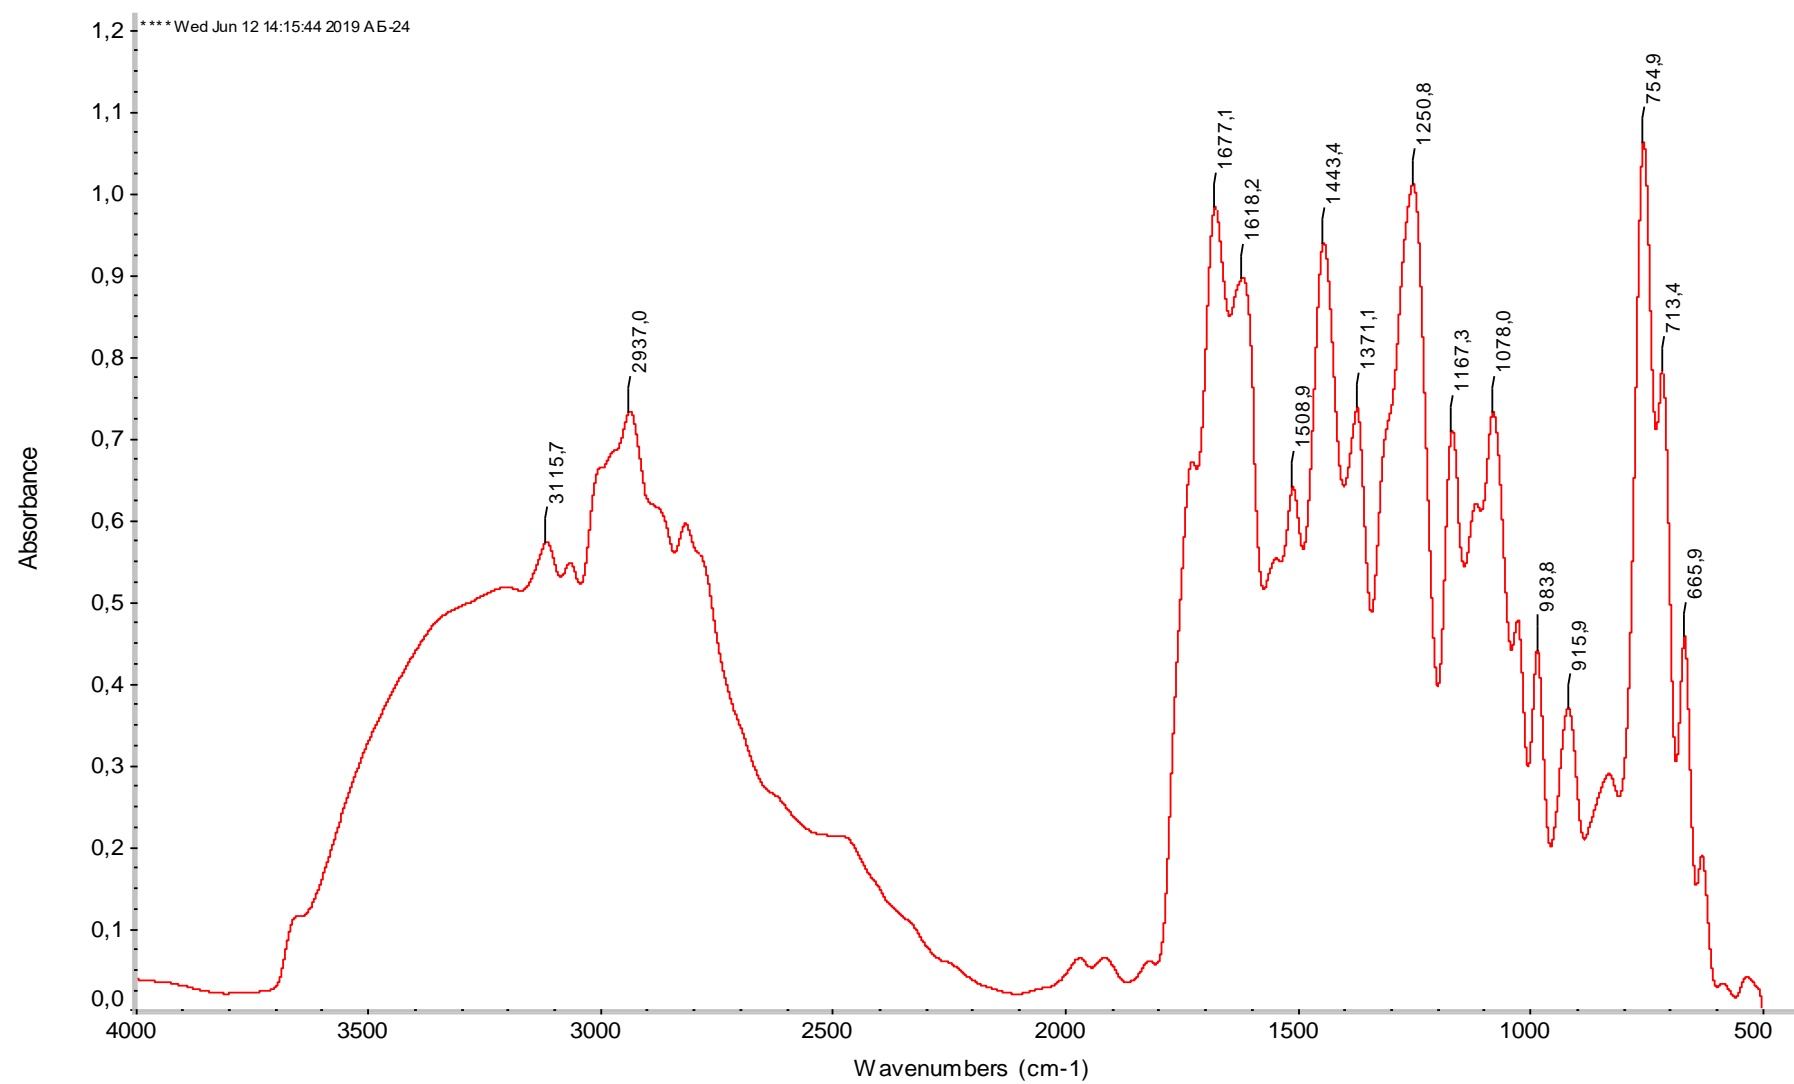

**Figure S6.** IR spectrum of O-benzoyloxime 3-(3-Boc)-7-[3-(1*H*-imidazol-1-yl)propyl]-3,7-diazabicyclo[3.3.1]nonan-9-one (6a)

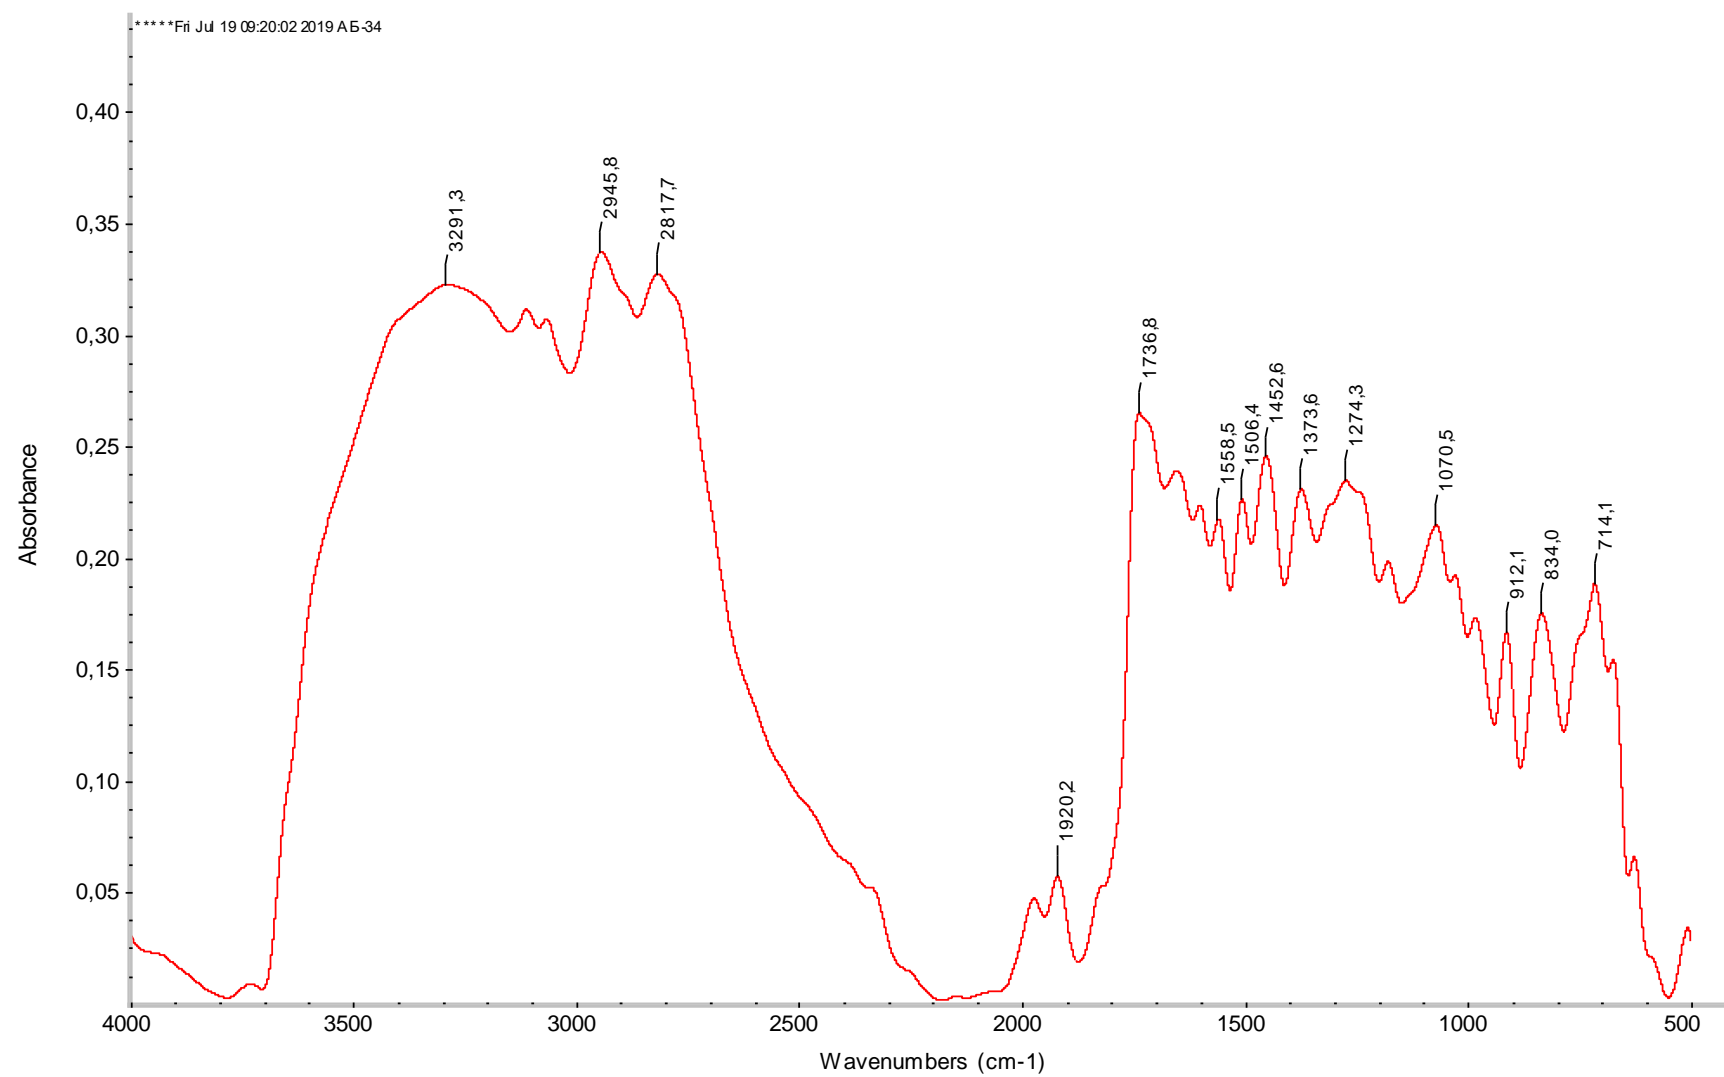

**Figure S7.** IR spectrum of O-benzoyl oxime of 3-(3-hydroxypropyl)-7-[3-(1*H*-imidazol-1-yl)propyl]-3,7-diazabicyclo[3.3.1]nonan-9-one (6b)



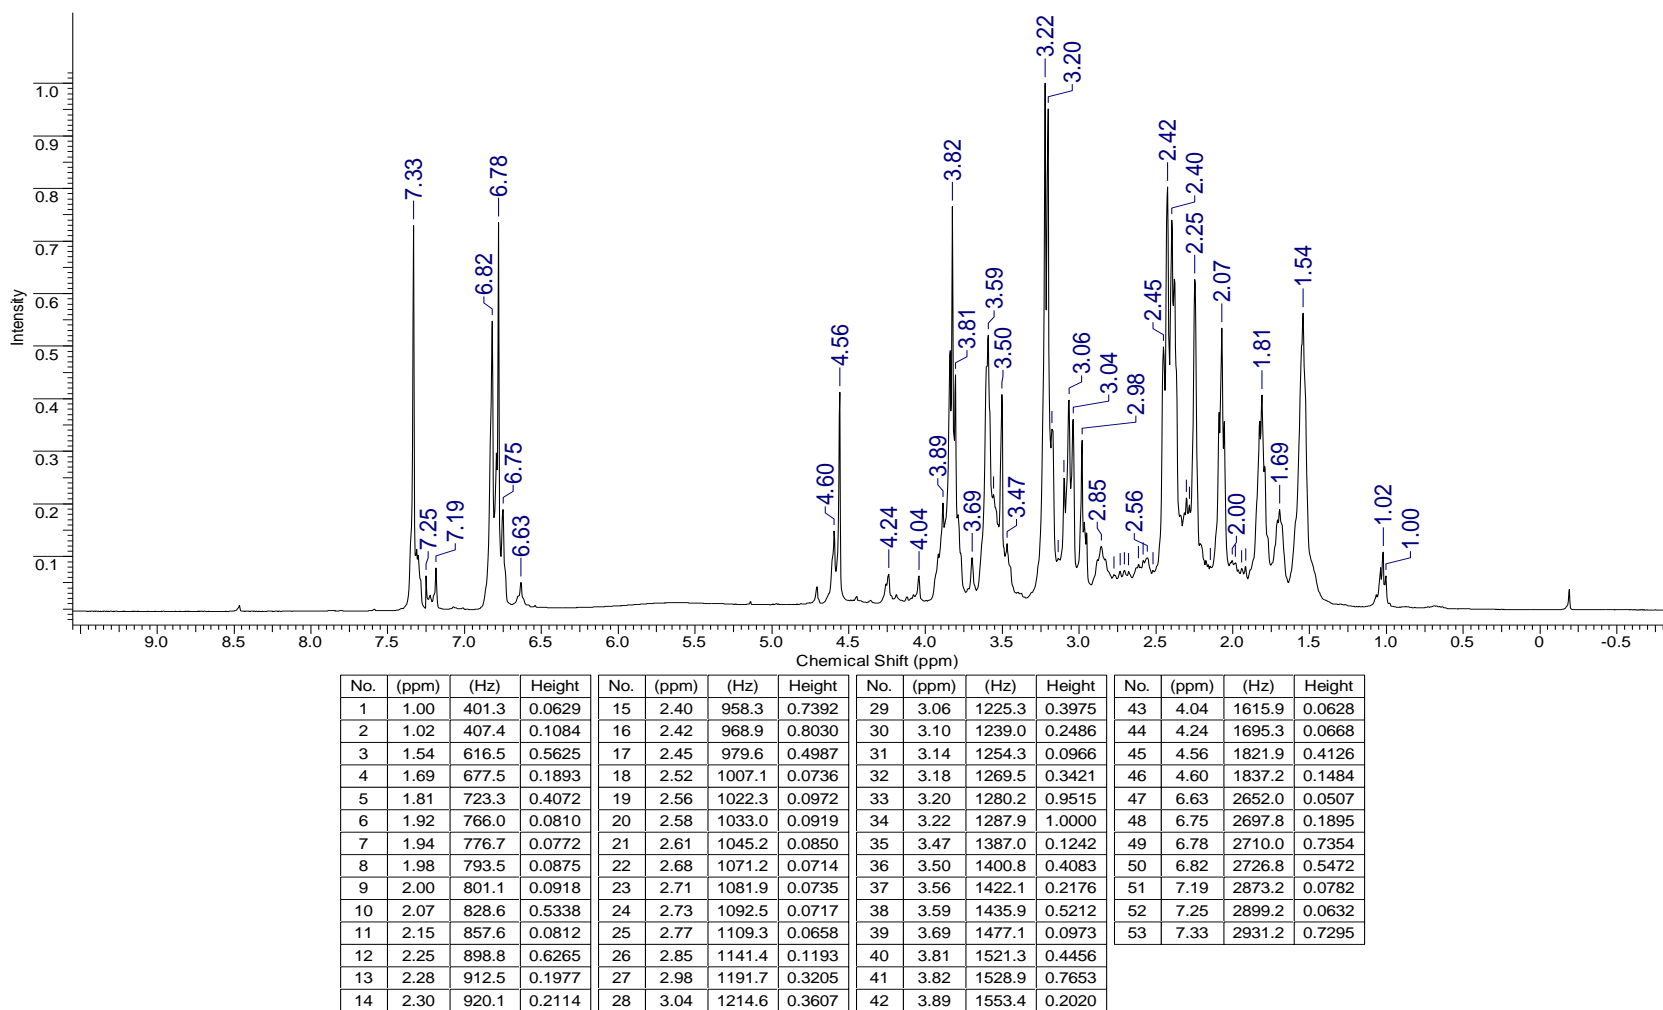

Figure S8.  $^1\text{H}$  NMR spectrum of 1-(3-hydroxypropyl)piperidin-4-one (**1b**) in  $\text{CHCl}_3$

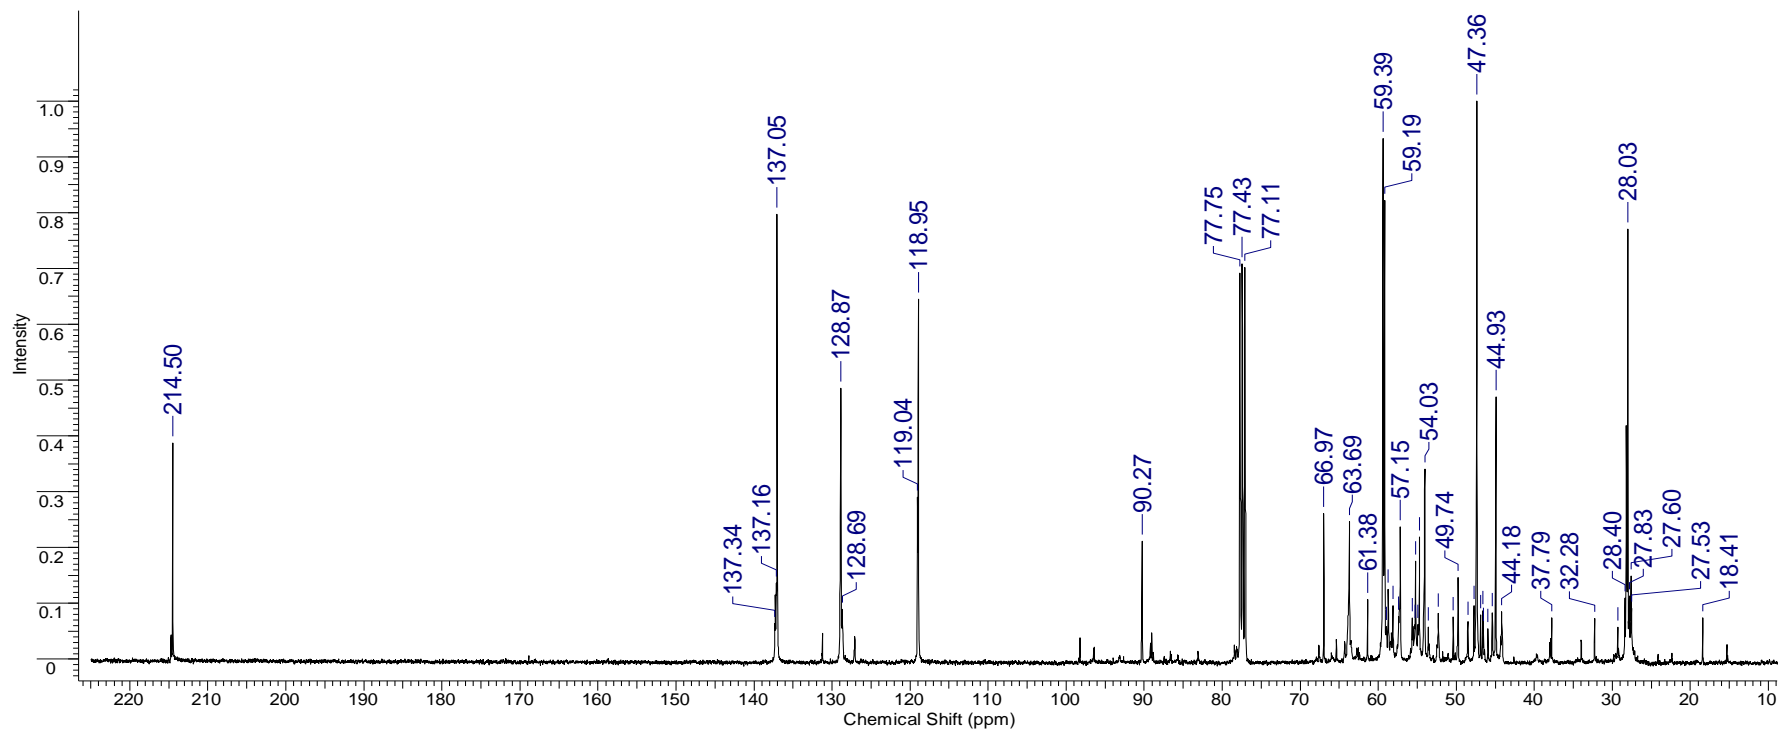

| No. | (ppm) | (Hz)   | Height | No. | (ppm) | (Hz)   | Height | No. | (ppm) | (Hz)   | Height | No. | (ppm)  | (Hz)    | Height |
|-----|-------|--------|--------|-----|-------|--------|--------|-----|-------|--------|--------|-----|--------|---------|--------|
| 1   | 18.41 | 1850.9 | 0.0738 | 16  | 45.94 | 4618.0 | 0.0548 | 31  | 55.30 | 5559.2 | 0.0621 | 46  | 77.63  | 7804.0  | 0.3023 |
| 2   | 27.53 | 2767.2 | 0.0915 | 17  | 46.50 | 4674.6 | 0.0559 | 32  | 55.54 | 5583.2 | 0.0588 | 47  | 77.75  | 7815.5  | 0.6918 |
| 3   | 27.60 | 2774.9 | 0.1485 | 18  | 46.58 | 4682.2 | 0.0867 | 33  | 55.65 | 5593.7 | 0.0739 | 48  | 90.27  | 9073.9  | 0.2111 |
| 4   | 27.70 | 2784.5 | 0.0537 | 19  | 46.87 | 4712.0 | 0.0789 | 34  | 57.15 | 5745.2 | 0.2371 | 49  | 118.95 | 11957.0 | 0.6447 |
| 5   | 27.83 | 2797.9 | 0.1132 | 20  | 47.36 | 4760.8 | 1.0000 | 35  | 57.40 | 5770.1 | 0.0766 | 50  | 119.04 | 11966.6 | 0.2898 |
| 6   | 27.93 | 2807.5 | 0.0674 | 21  | 47.74 | 4799.2 | 0.0955 | 36  | 58.13 | 5843.9 | 0.0958 | 51  | 128.69 | 12936.6 | 0.0891 |
| 7   | 28.03 | 2818.0 | 0.7700 | 22  | 48.50 | 4875.9 | 0.0669 | 37  | 58.71 | 5901.4 | 0.1253 | 52  | 128.87 | 12954.8 | 0.4853 |
| 8   | 28.22 | 2837.2 | 0.4182 | 23  | 49.74 | 5000.5 | 0.1465 | 38  | 58.94 | 5925.4 | 0.0579 | 53  | 137.05 | 13777.1 | 0.7972 |
| 9   | 28.40 | 2854.4 | 0.1099 | 24  | 50.37 | 5063.7 | 0.0756 | 39  | 59.19 | 5950.3 | 0.8214 | 54  | 137.16 | 13787.7 | 0.1362 |
| 10  | 29.31 | 2946.5 | 0.0573 | 25  | 52.32 | 5259.2 | 0.0819 | 40  | 59.39 | 5970.4 | 0.9327 | 55  | 137.26 | 13798.2 | 0.1148 |
| 11  | 32.28 | 3244.5 | 0.0732 | 26  | 53.59 | 5386.7 | 0.0569 | 41  | 61.38 | 6169.8 | 0.1068 | 56  | 137.34 | 13805.9 | 0.0634 |
| 12  | 37.79 | 3798.5 | 0.0739 | 27  | 54.03 | 5431.8 | 0.3406 | 42  | 63.69 | 6402.7 | 0.2461 | 57  | 214.50 | 21562.8 | 0.3870 |
| 13  | 44.18 | 4440.7 | 0.0848 | 28  | 54.71 | 5499.8 | 0.2190 | 43  | 66.97 | 6732.4 | 0.2609 |     |        |         |        |
| 14  | 44.93 | 4516.4 | 0.4697 | 29  | 54.94 | 5522.8 | 0.0615 | 44  | 77.11 | 7751.3 | 0.7021 |     |        |         |        |
| 15  | 45.39 | 4562.4 | 0.0829 | 30  | 55.23 | 5551.6 | 0.1754 | 45  | 77.43 | 7783.8 | 0.7081 |     |        |         |        |

**Figure S9.**  $^{13}\text{C}$  NMR spectrum of 1-(3-hydroxypropyl)piperidin-4-one (**1b**) in  $\text{CHCl}_3$

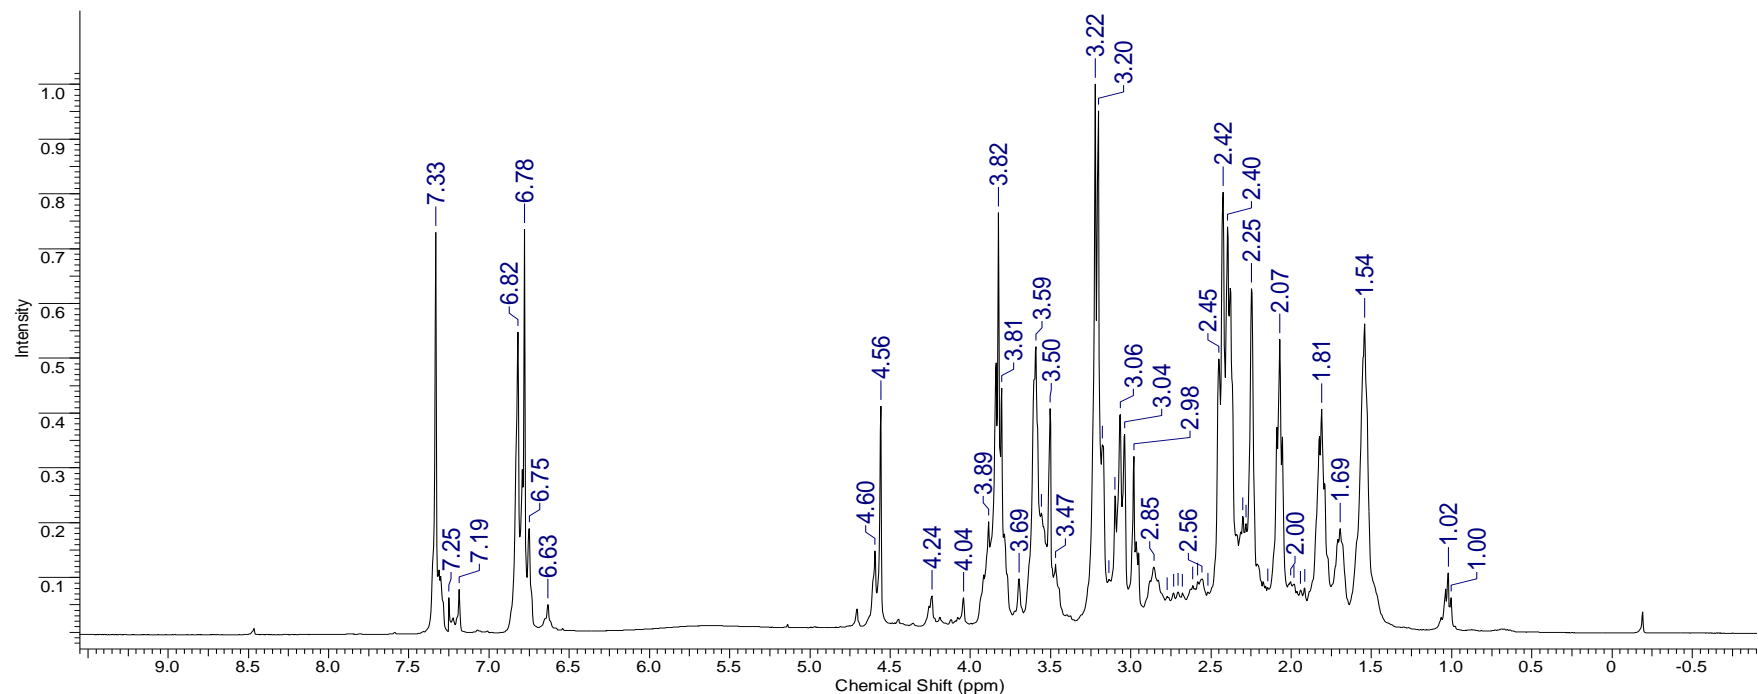

| No. | (ppm) | (Hz)  | Height | No. | (ppm) | (Hz)   | Height | No. | (ppm) | (Hz)   | Height | No. | (ppm) | (Hz)   | Height |
|-----|-------|-------|--------|-----|-------|--------|--------|-----|-------|--------|--------|-----|-------|--------|--------|
| 1   | 1.00  | 401.3 | 0.0629 | 15  | 2.40  | 958.3  | 0.7392 | 29  | 3.06  | 1225.3 | 0.3975 | 43  | 4.04  | 1615.9 | 0.0628 |
| 2   | 1.02  | 407.4 | 0.1084 | 16  | 2.42  | 968.9  | 0.8030 | 30  | 3.10  | 1239.0 | 0.2486 | 44  | 4.24  | 1695.3 | 0.0668 |
| 3   | 1.54  | 616.5 | 0.5625 | 17  | 2.45  | 979.6  | 0.4987 | 31  | 3.14  | 1254.3 | 0.0966 | 45  | 4.56  | 1821.9 | 0.4126 |
| 4   | 1.69  | 677.5 | 0.1893 | 18  | 2.52  | 1007.1 | 0.0736 | 32  | 3.18  | 1269.5 | 0.3421 | 46  | 4.60  | 1837.2 | 0.1484 |
| 5   | 1.81  | 723.3 | 0.4072 | 19  | 2.56  | 1022.3 | 0.0972 | 33  | 3.20  | 1280.2 | 0.9515 | 47  | 6.63  | 2652.0 | 0.0507 |
| 6   | 1.92  | 766.0 | 0.0810 | 20  | 2.58  | 1033.0 | 0.0919 | 34  | 3.22  | 1287.9 | 1.0000 | 48  | 6.75  | 2697.8 | 0.1895 |
| 7   | 1.94  | 776.7 | 0.0772 | 21  | 2.61  | 1045.2 | 0.0850 | 35  | 3.47  | 1387.0 | 0.1242 | 49  | 6.78  | 2710.0 | 0.7354 |
| 8   | 1.98  | 793.5 | 0.0875 | 22  | 2.68  | 1071.2 | 0.0714 | 36  | 3.50  | 1400.8 | 0.4083 | 50  | 6.82  | 2726.8 | 0.5472 |
| 9   | 2.00  | 801.1 | 0.0918 | 23  | 2.71  | 1081.9 | 0.0735 | 37  | 3.56  | 1422.1 | 0.2176 | 51  | 7.19  | 2873.2 | 0.0782 |
| 10  | 2.07  | 828.6 | 0.5338 | 24  | 2.73  | 1092.5 | 0.0717 | 38  | 3.59  | 1435.9 | 0.5212 | 52  | 7.25  | 2899.2 | 0.0632 |
| 11  | 2.15  | 857.6 | 0.0812 | 25  | 2.77  | 1109.3 | 0.0658 | 39  | 3.69  | 1477.1 | 0.0973 | 53  | 7.33  | 2931.2 | 0.7295 |
| 12  | 2.25  | 898.8 | 0.6265 | 26  | 2.85  | 1141.4 | 0.1193 | 40  | 3.81  | 1521.3 | 0.4456 |     |       |        |        |
| 13  | 2.28  | 912.5 | 0.1977 | 27  | 2.98  | 1191.7 | 0.3205 | 41  | 3.82  | 1528.9 | 0.7653 |     |       |        |        |
| 14  | 2.30  | 920.1 | 0.2114 | 28  | 3.04  | 1214.6 | 0.3607 | 42  | 3.89  | 1553.4 | 0.2020 |     |       |        |        |

**Figure S10.**  $^1\text{H}$  NMR spectrum of 3-(3-hydroxypropyl)-7-[3-(1*H*-imidazol-1-yl)propyl]-3,7-diazabicyclo[3.3.1]nonan-9-one (**2b**)<sub>in</sub>  $\text{CHCl}_3$

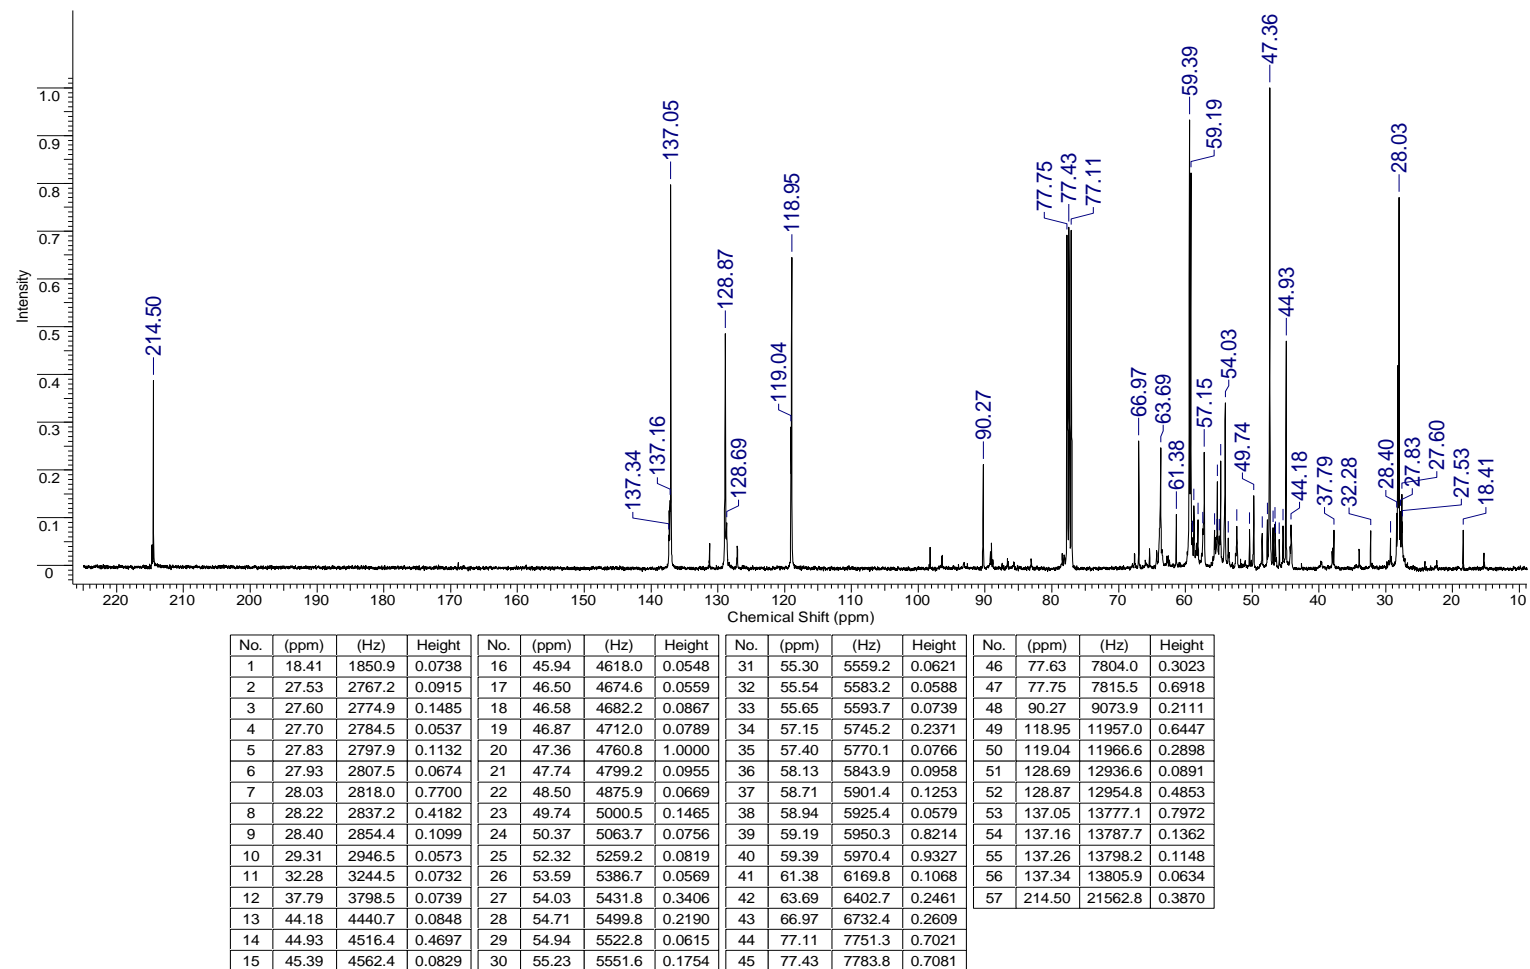

**Figure S11.**  $^{13}\text{C}$  NMR spectrum of 3-(3-hydroxypropyl)-7-[3-(1*H*-imidazol-1-yl)propyl]-3,7-diazabicyclo[3.3.1]nonan-9-one (**2b**)<sub>in</sub>  $\text{CHCl}_3$

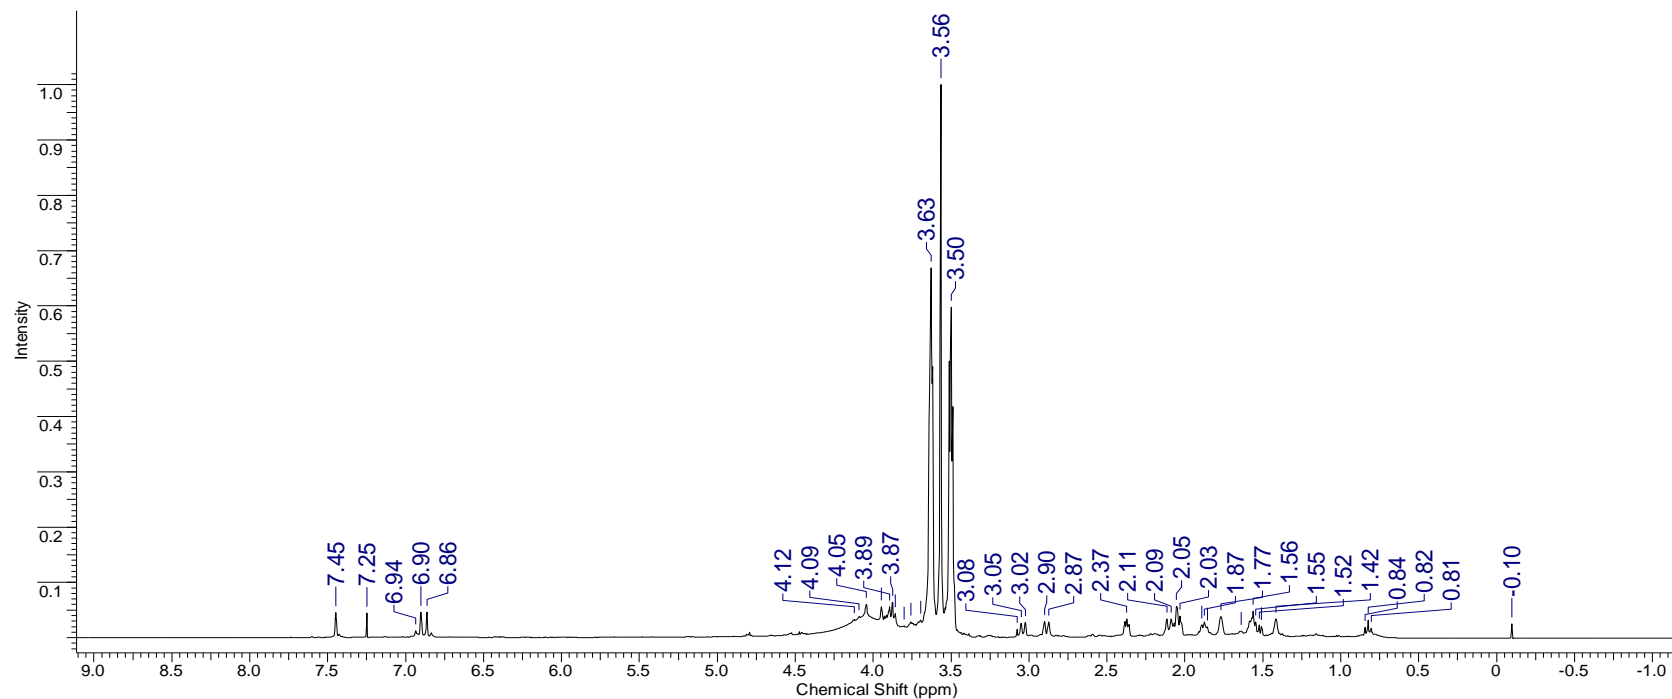

| No. | (ppm) | (Hz)  | Height | No. | (ppm) | (Hz)   | Height | No. | (ppm) | (Hz)   | Height | No. | (ppm) | (Hz)   | Height |
|-----|-------|-------|--------|-----|-------|--------|--------|-----|-------|--------|--------|-----|-------|--------|--------|
| 1   | -0.10 | -39.7 | 0.0254 | 12  | 1.85  | 741.6  | 0.0200 | 23  | 3.05  | 1219.2 | 0.0260 | 34  | 3.95  | 1577.8 | 0.0556 |
| 2   | 0.81  | 322.0 | 0.0169 | 13  | 1.87  | 749.2  | 0.0289 | 24  | 3.08  | 1229.9 | 0.0155 | 35  | 4.05  | 1617.4 | 0.0602 |
| 3   | 0.82  | 329.6 | 0.0317 | 14  | 1.89  | 756.8  | 0.0232 | 25  | 3.50  | 1399.2 | 0.5973 | 36  | 4.09  | 1635.8 | 0.0385 |
| 4   | 0.84  | 337.2 | 0.0189 | 15  | 2.03  | 811.8  | 0.0389 | 26  | 3.56  | 1425.2 | 1.0000 | 37  | 4.12  | 1648.0 | 0.0326 |
| 5   | 1.42  | 566.1 | 0.0334 | 16  | 2.05  | 820.9  | 0.0566 | 27  | 3.63  | 1451.1 | 0.6684 | 38  | 6.86  | 2743.5 | 0.0458 |
| 6   | 1.51  | 602.7 | 0.0208 | 17  | 2.09  | 834.7  | 0.0333 | 28  | 3.69  | 1477.1 | 0.0324 | 39  | 6.90  | 2758.8 | 0.0462 |
| 7   | 1.52  | 608.8 | 0.0234 | 18  | 2.11  | 845.3  | 0.0335 | 29  | 3.76  | 1503.0 | 0.0281 | 40  | 6.94  | 2772.5 | 0.0128 |
| 8   | 1.55  | 618.0 | 0.0284 | 19  | 2.37  | 949.1  | 0.0339 | 30  | 3.80  | 1519.8 | 0.0213 | 41  | 7.25  | 2897.7 | 0.0442 |
| 9   | 1.56  | 624.1 | 0.0478 | 20  | 2.87  | 1149.0 | 0.0287 | 31  | 3.86  | 1542.7 | 0.0438 | 42  | 7.45  | 2977.0 | 0.0452 |
| 10  | 1.64  | 654.6 | 0.0117 | 21  | 2.90  | 1159.7 | 0.0297 | 32  | 3.87  | 1548.8 | 0.0637 |     |       |        |        |
| 11  | 1.77  | 706.5 | 0.0378 | 22  | 3.02  | 1208.5 | 0.0277 | 33  | 3.89  | 1556.4 | 0.0561 |     |       |        |        |

**Figure S12.**  $^1\text{H}$  NMR spectrum of 3-(3-hydroxypropyl)-7-[3-(1*H*-imidazol-1-yl)propyl]-3,7-diazabicyclo[3.3.1]nonane (**3b**) in  $\text{CHCl}_3$

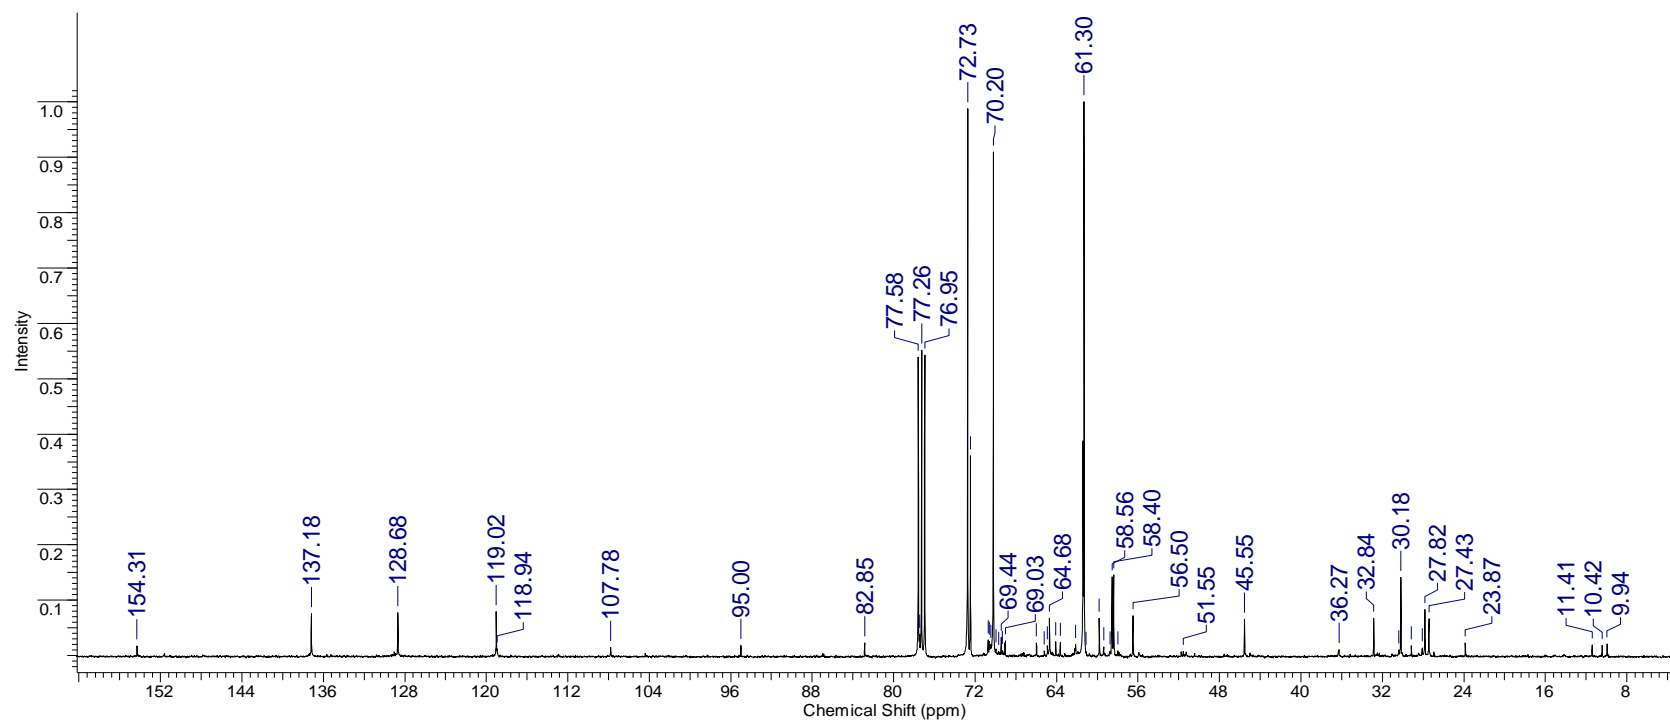

| No. | (ppm) | (Hz)   | Height | No. | (ppm) | (Hz)   | Height | No. | (ppm) | (Hz)   | Height | No. | (ppm)  | (Hz)    | Height |
|-----|-------|--------|--------|-----|-------|--------|--------|-----|-------|--------|--------|-----|--------|---------|--------|
| 1   | 9.94  | 998.9  | 0.0216 | 16  | 56.50 | 5680.0 | 0.0718 | 31  | 64.89 | 6523.5 | 0.0179 | 46  | 76.95  | 7735.0  | 0.5423 |
| 2   | 10.42 | 1047.7 | 0.0183 | 17  | 57.98 | 5828.6 | 0.0089 | 32  | 65.20 | 6554.1 | 0.0086 | 47  | 77.26  | 7766.6  | 0.5518 |
| 3   | 11.41 | 1147.4 | 0.0198 | 18  | 58.40 | 5870.7 | 0.1460 | 33  | 65.97 | 6631.8 | 0.0235 | 48  | 77.46  | 7786.7  | 0.0385 |
| 4   | 23.87 | 2399.2 | 0.0231 | 19  | 58.56 | 5887.0 | 0.1426 | 34  | 69.03 | 6939.4 | 0.0264 | 49  | 77.58  | 7799.2  | 0.5388 |
| 5   | 27.43 | 2757.6 | 0.0668 | 20  | 58.73 | 5904.3 | 0.0086 | 35  | 69.08 | 6944.2 | 0.0230 | 50  | 82.85  | 8328.2  | 0.0231 |
| 6   | 27.82 | 2796.9 | 0.0834 | 21  | 59.37 | 5968.5 | 0.0160 | 36  | 69.31 | 6967.2 | 0.0091 | 51  | 95.00  | 9550.3  | 0.0184 |
| 7   | 28.11 | 2825.7 | 0.0138 | 22  | 59.80 | 6011.6 | 0.0681 | 37  | 69.44 | 6980.6 | 0.0328 | 52  | 107.78 | 10834.6 | 0.0148 |
| 8   | 29.16 | 2931.1 | 0.0179 | 23  | 61.09 | 6141.0 | 0.0073 | 38  | 69.70 | 7006.5 | 0.0079 | 53  | 118.94 | 11956.0 | 0.0118 |
| 9   | 30.18 | 3033.7 | 0.1410 | 24  | 61.30 | 6162.1 | 1.0000 | 39  | 69.95 | 7031.4 | 0.0124 | 54  | 119.02 | 11964.7 | 0.0791 |
| 10  | 30.40 | 3055.7 | 0.0104 | 25  | 61.40 | 6172.7 | 0.3879 | 40  | 70.20 | 7057.3 | 0.9083 | 55  | 128.68 | 12935.6 | 0.0773 |
| 11  | 32.84 | 3301.1 | 0.0678 | 26  | 62.14 | 6246.5 | 0.0206 | 41  | 70.45 | 7082.2 | 0.0201 | 56  | 137.18 | 13790.6 | 0.0760 |
| 12  | 36.27 | 3646.1 | 0.0116 | 27  | 62.20 | 6252.2 | 0.0132 | 42  | 70.61 | 7098.5 | 0.0257 | 57  | 154.31 | 15512.0 | 0.0180 |
| 13  | 36.33 | 3651.9 | 0.0098 | 28  | 63.63 | 6396.0 | 0.0236 | 43  | 70.73 | 7110.0 | 0.0288 |     |        |         |        |
| 14  | 45.55 | 4578.7 | 0.0660 | 29  | 64.07 | 6441.0 | 0.0246 | 44  | 72.45 | 7283.5 | 0.3608 |     |        |         |        |
| 15  | 51.55 | 5182.6 | 0.0080 | 30  | 64.68 | 6502.4 | 0.0674 | 45  | 72.73 | 7311.3 | 0.9870 |     |        |         |        |

**Figure S13.**  $^{13}\text{C}$  NMR spectrum of 3-(3-hydroxypropyl)-7-[3-(1*H*-imidazol-1-yl)propyl]-3,7-diazabicyclo[3.3.1]nonane (**3b**)\_in\_ $\text{CHCl}_3$

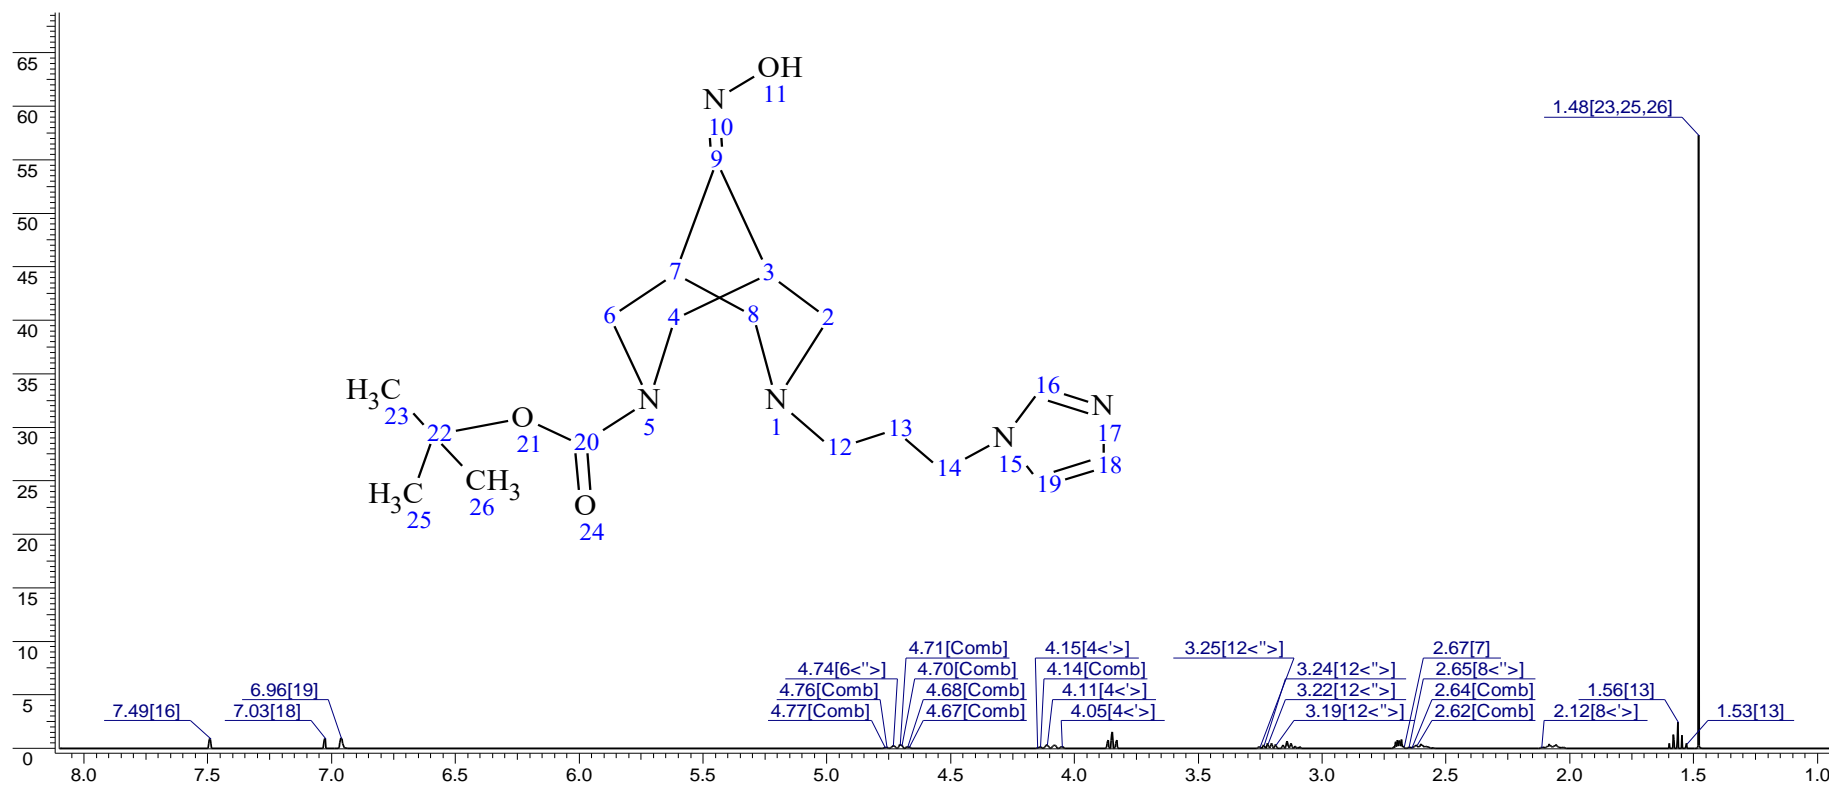

| Group | nH | Shift | Error | Group    | nH | Shift | Error |
|-------|----|-------|-------|----------|----|-------|-------|
| 2<'>  | 1  | 2.60  | 0.34  | 11       | 1  | 6.96  | 0.90  |
| 2<'>  | 1  | 2.07  | 0.33  | 12<'>    | 1  | 3.22  | 0.29  |
| 3     | 1  | 2.69  | 0.68  | 12<'>    | 1  | 3.13  | 0.26  |
| 4<'>  | 1  | 4.72  | 0.63  | 13       | 2  | 1.56  | 0.13  |
| 4<'>  | 1  | 4.10  | 0.40  | 14       | 2  | 3.85  | 0.21  |
| 6<'>  | 1  | 4.72  | 0.63  | 16       | 1  | 7.49  | 0.11  |
| 6<'>  | 1  | 4.10  | 0.40  | 18       | 1  | 7.03  | 0.09  |
| 7     | 1  | 2.69  | 0.68  | 19       | 1  | 6.96  | 0.15  |
| 8<'>  | 1  | 2.60  | 0.34  | 23,25,26 | 9  | 1.48  | 0.05  |
| 8<'>  | 1  | 2.07  | 0.33  |          |    |       |       |

**Figure S14.**  $^1\text{H}$  NMR spectrum of oxime of 3-(3-Boc)-7-[3-(1*H*-imidazol-1-yl)propyl]-3,7-diazabicyclo[3.3.1]nonan-9-one (**5a**)<sub>in\_DMSO</sub>

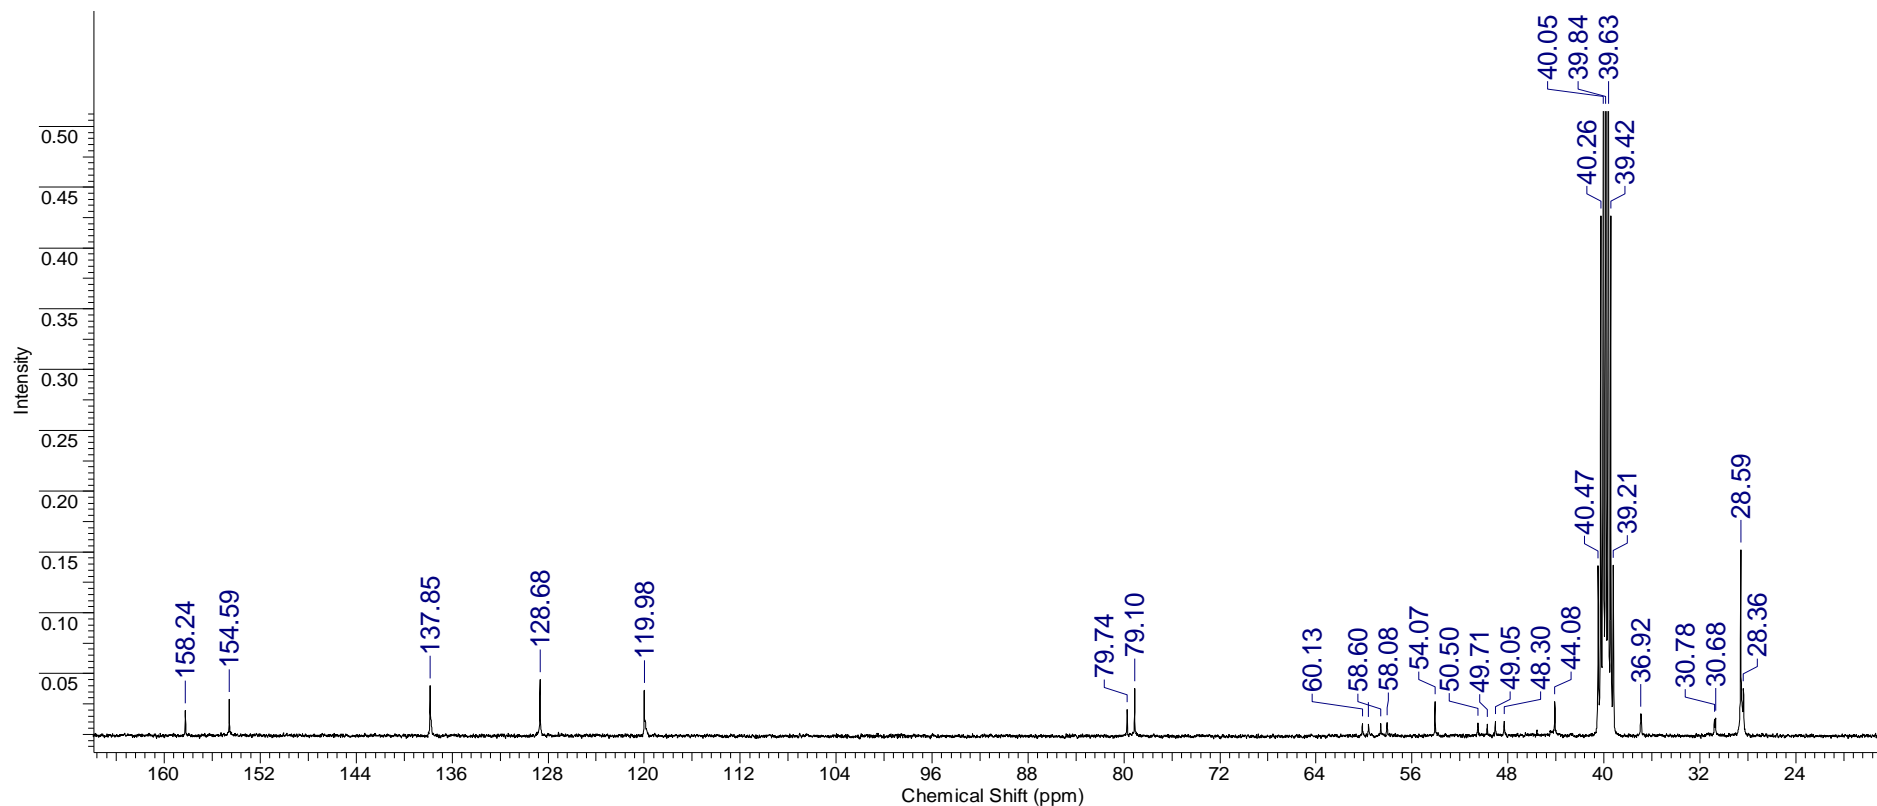

| No. | (ppm) | (Hz)   | Height | No. | (ppm) | (Hz)   | Height | No. | (ppm)  | (Hz)    | Height |
|-----|-------|--------|--------|-----|-------|--------|--------|-----|--------|---------|--------|
| 1   | 28.36 | 2850.6 | 0.0375 | 11  | 40.26 | 4046.8 | 0.4265 | 21  | 59.60  | 5991.5  | 0.0082 |
| 2   | 28.59 | 2873.6 | 0.1518 | 12  | 40.47 | 4067.9 | 0.1388 | 22  | 60.13  | 6044.2  | 0.0088 |
| 3   | 30.68 | 3084.5 | 0.0135 | 13  | 44.08 | 4431.1 | 0.0269 | 23  | 79.10  | 7951.6  | 0.0378 |
| 4   | 30.78 | 3094.1 | 0.0124 | 14  | 48.30 | 4855.7 | 0.0106 | 24  | 79.74  | 8015.8  | 0.0204 |
| 5   | 36.92 | 3711.3 | 0.0169 | 15  | 49.05 | 4930.5 | 0.0108 | 25  | 119.98 | 12061.5 | 0.0362 |
| 6   | 39.21 | 3941.3 | 0.1391 | 16  | 49.71 | 4997.6 | 0.0084 | 26  | 128.68 | 12935.6 | 0.0453 |
| 7   | 39.42 | 3962.4 | 0.4265 | 17  | 50.50 | 5076.2 | 0.0090 | 27  | 137.85 | 13857.6 | 0.0401 |
| 8   | 39.63 | 3983.5 | 0.8513 | 18  | 54.07 | 5435.6 | 0.0267 | 28  | 154.59 | 15539.8 | 0.0288 |
| 9   | 39.84 | 4004.6 | 1.0000 | 19  | 58.08 | 5838.2 | 0.0097 | 29  | 158.24 | 15906.8 | 0.0196 |
| 10  | 40.05 | 4025.7 | 0.8513 | 20  | 58.60 | 5890.9 | 0.0086 |     |        |         |        |

**Figure S15.**  $^{13}\text{C}$  NMR spectrum of oxime of 3-(3-Boc)-7-[3-(1*H*-imidazol-1-yl)propyl]-3,7-diazabicyclo[3.3.1]nonan-9-one (**5a**)\_in\_DMSO



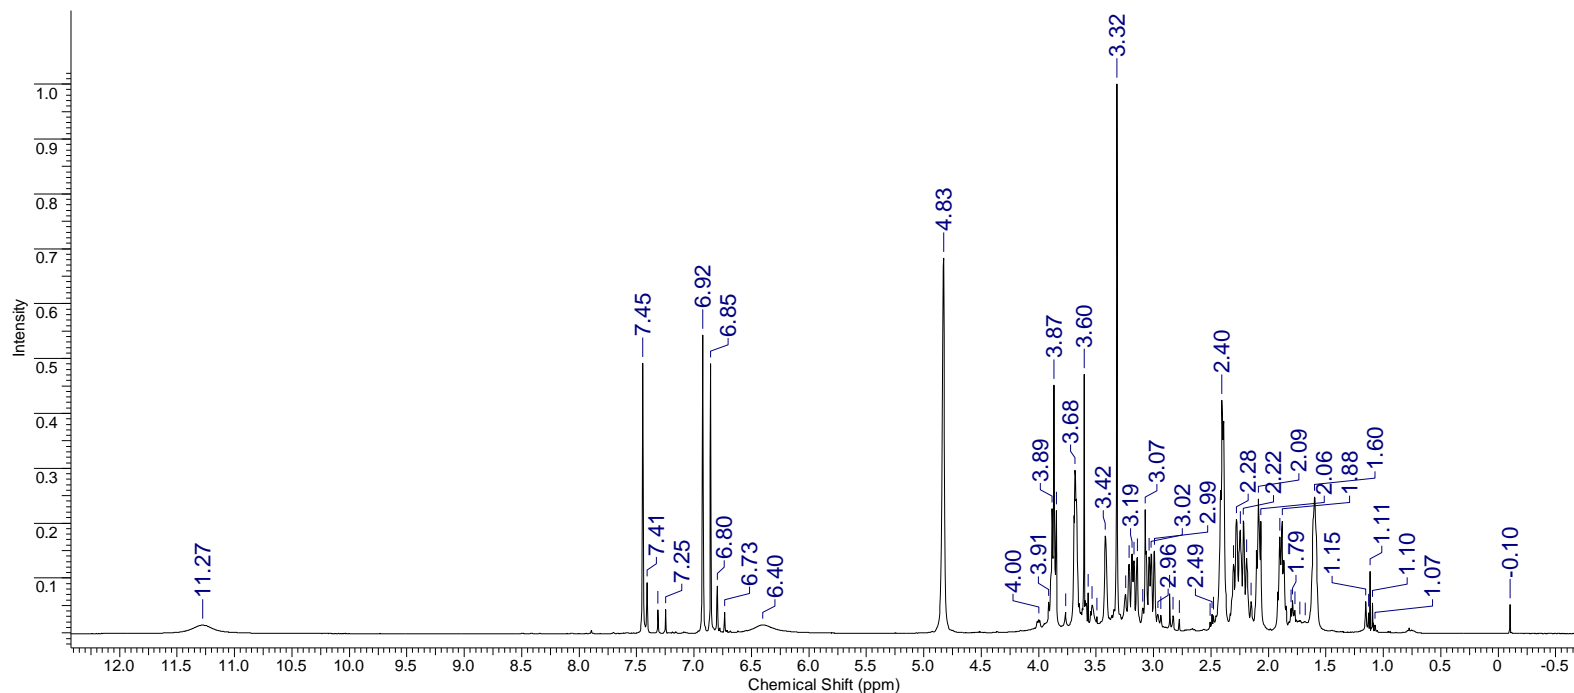

| No. | (ppm) | (Hz)  | Height | No. | (ppm) | (Hz)   | Height | No. | (ppm) | (Hz)   | Height | No. | (ppm) | (Hz)   | Height |
|-----|-------|-------|--------|-----|-------|--------|--------|-----|-------|--------|--------|-----|-------|--------|--------|
| 1   | -0.10 | -41.2 | 0.0513 | 18  | 2.19  | 875.9  | 0.1362 | 35  | 3.07  | 1228.3 | 0.2248 | 52  | 3.89  | 1553.4 | 0.2263 |
| 2   | 1.07  | 428.8 | 0.0146 | 19  | 2.22  | 886.5  | 0.2042 | 36  | 3.10  | 1237.5 | 0.0456 | 53  | 3.91  | 1564.0 | 0.0559 |
| 3   | 1.10  | 437.9 | 0.0547 | 20  | 2.24  | 897.2  | 0.1873 | 37  | 3.14  | 1255.8 | 0.1377 | 54  | 4.00  | 1599.1 | 0.0239 |
| 4   | 1.11  | 445.6 | 0.1123 | 21  | 2.28  | 911.0  | 0.2066 | 38  | 3.17  | 1268.0 | 0.1311 | 55  | 4.83  | 1930.2 | 0.6824 |
| 5   | 1.13  | 451.7 | 0.0362 | 22  | 2.31  | 921.6  | 0.1253 | 39  | 3.19  | 1274.1 | 0.1438 | 56  | 6.40  | 2558.9 | 0.0146 |
| 6   | 1.15  | 460.8 | 0.0565 | 23  | 2.40  | 961.3  | 0.4237 | 40  | 3.21  | 1284.8 | 0.1253 | 57  | 6.73  | 2691.7 | 0.0377 |
| 7   | 1.60  | 639.4 | 0.2477 | 24  | 2.48  | 990.3  | 0.0311 | 41  | 3.24  | 1297.0 | 0.0703 | 58  | 6.80  | 2717.6 | 0.0857 |
| 8   | 1.68  | 671.4 | 0.0209 | 25  | 2.49  | 996.4  | 0.0336 | 42  | 3.32  | 1327.5 | 1.0000 | 59  | 6.85  | 2740.5 | 0.4908 |
| 9   | 1.73  | 691.2 | 0.0228 | 26  | 2.51  | 1002.5 | 0.0200 | 43  | 3.42  | 1367.2 | 0.1763 | 60  | 6.92  | 2768.0 | 0.5424 |
| 10  | 1.77  | 708.0 | 0.0406 | 27  | 2.77  | 1109.3 | 0.0253 | 44  | 3.49  | 1396.2 | 0.0298 | 61  | 7.25  | 2897.7 | 0.0426 |
| 11  | 1.79  | 715.6 | 0.0588 | 28  | 2.83  | 1132.2 | 0.0311 | 45  | 3.53  | 1413.0 | 0.0504 | 62  | 7.31  | 2923.6 | 0.0420 |
| 12  | 1.81  | 721.8 | 0.0444 | 29  | 2.86  | 1142.9 | 0.0714 | 46  | 3.57  | 1426.7 | 0.0730 | 63  | 7.41  | 2961.7 | 0.0917 |
| 13  | 1.88  | 752.3 | 0.2029 | 30  | 2.94  | 1173.4 | 0.0321 | 47  | 3.60  | 1440.4 | 0.4707 | 64  | 7.45  | 2977.0 | 0.4913 |
| 14  | 1.90  | 759.9 | 0.1748 | 31  | 2.96  | 1184.1 | 0.0335 | 48  | 3.68  | 1472.5 | 0.2965 | 65  | 11.27 | 4507.5 | 0.0142 |
| 15  | 2.06  | 825.5 | 0.2029 | 32  | 2.99  | 1196.3 | 0.1489 | 49  | 3.77  | 1506.1 | 0.0370 |     |       |        |        |
| 16  | 2.09  | 834.7 | 0.2438 | 33  | 3.02  | 1208.5 | 0.1435 | 50  | 3.85  | 1538.1 | 0.2225 |     |       |        |        |
| 17  | 2.15  | 860.6 | 0.0573 | 34  | 3.04  | 1214.6 | 0.1384 | 51  | 3.87  | 1545.7 | 0.4513 |     |       |        |        |

**Figure S16.**  $^1\text{H}$  NMR spectrum of oxime of 3-(3-hydroxypropyl)-7-[3-(1*H*-imidazol-1-yl)propyl]-3,7-diazabicyclo[3.3.1]nonan-9-one (5b)\_in\_ $\text{CHCl}_3$

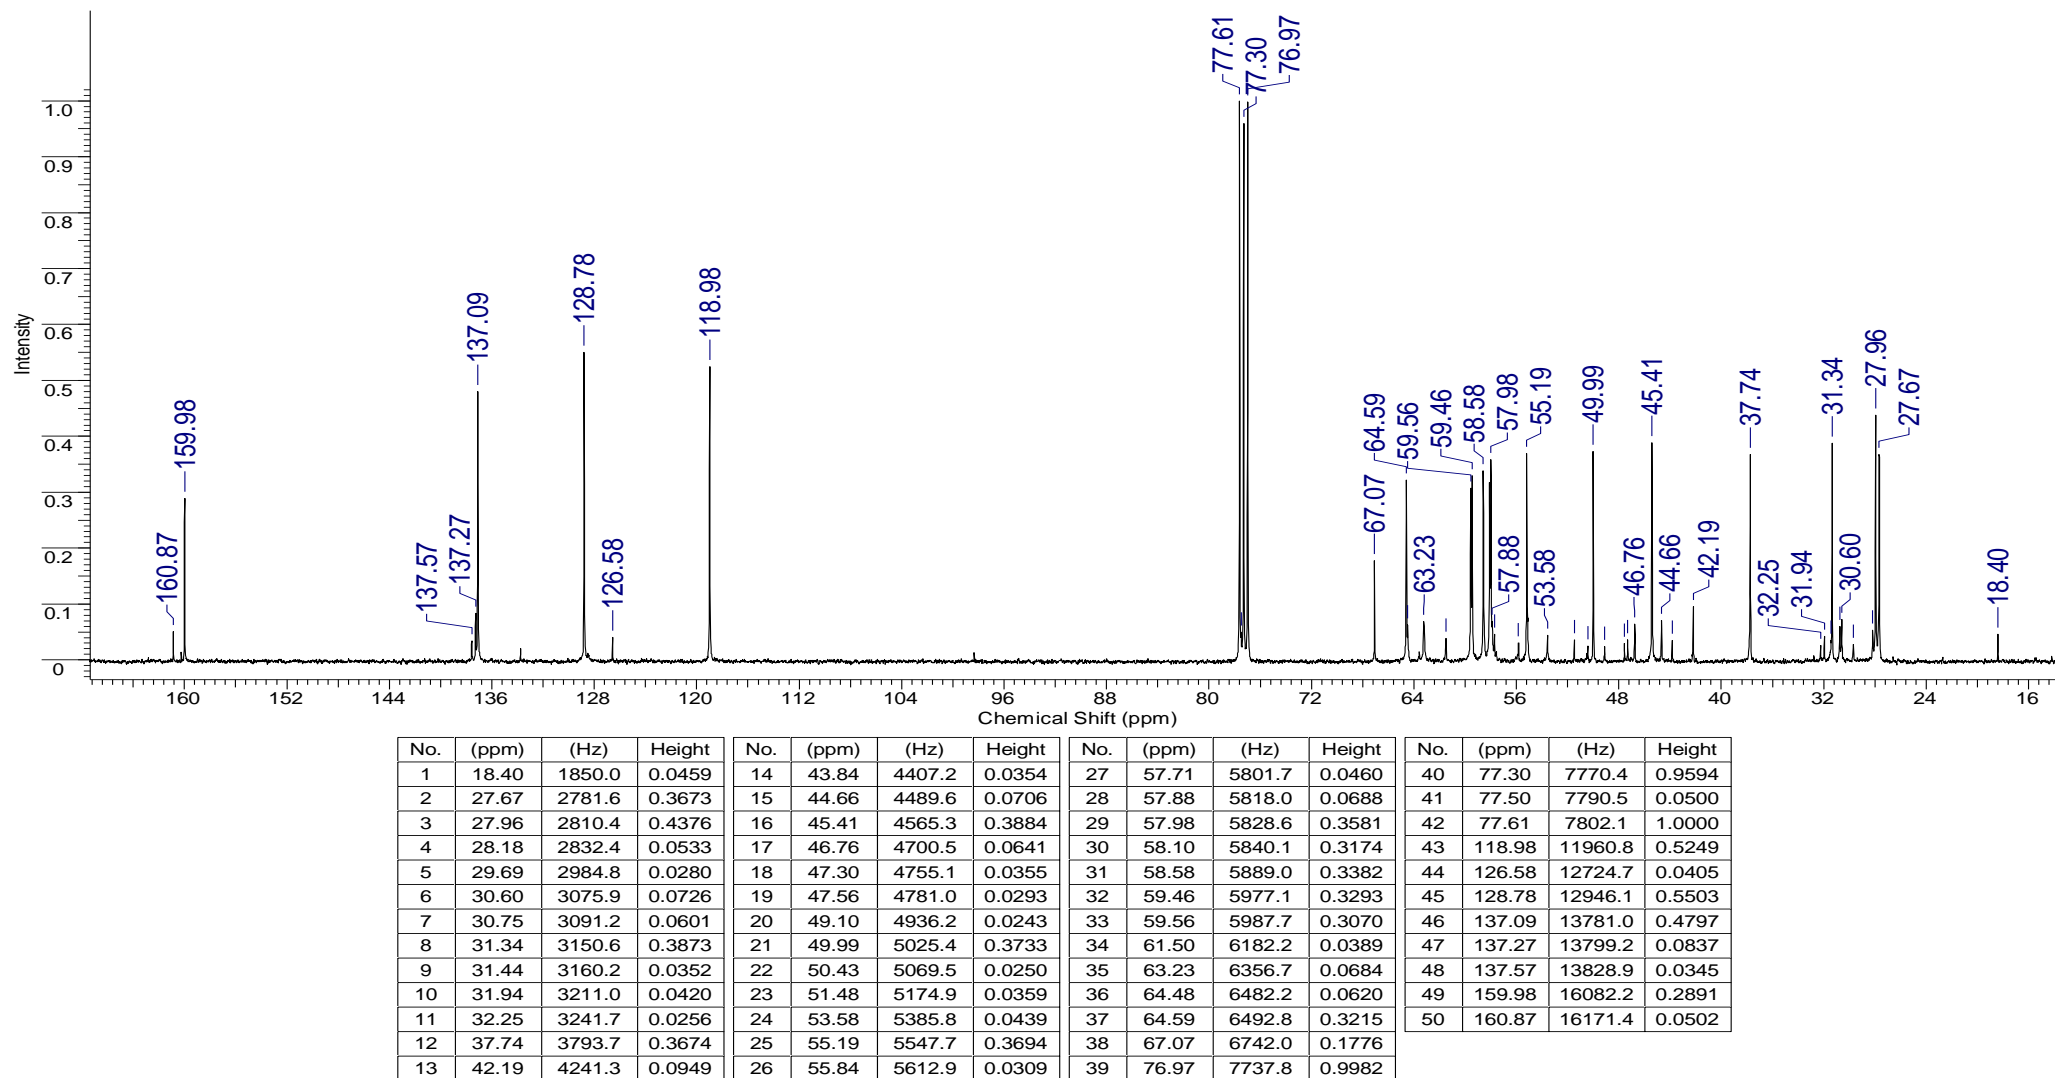

**Figure S17.**  $^{13}\text{C}$  NMR spectrum of oxime of 3-(3-hydroxypropyl)-7-[3-(1*H*-imidazol-1-yl)propyl]-3,7-diazabicyclo[3.3.1]nonan-9-one (5b)<sub>in</sub>  $\text{CHCl}_3$

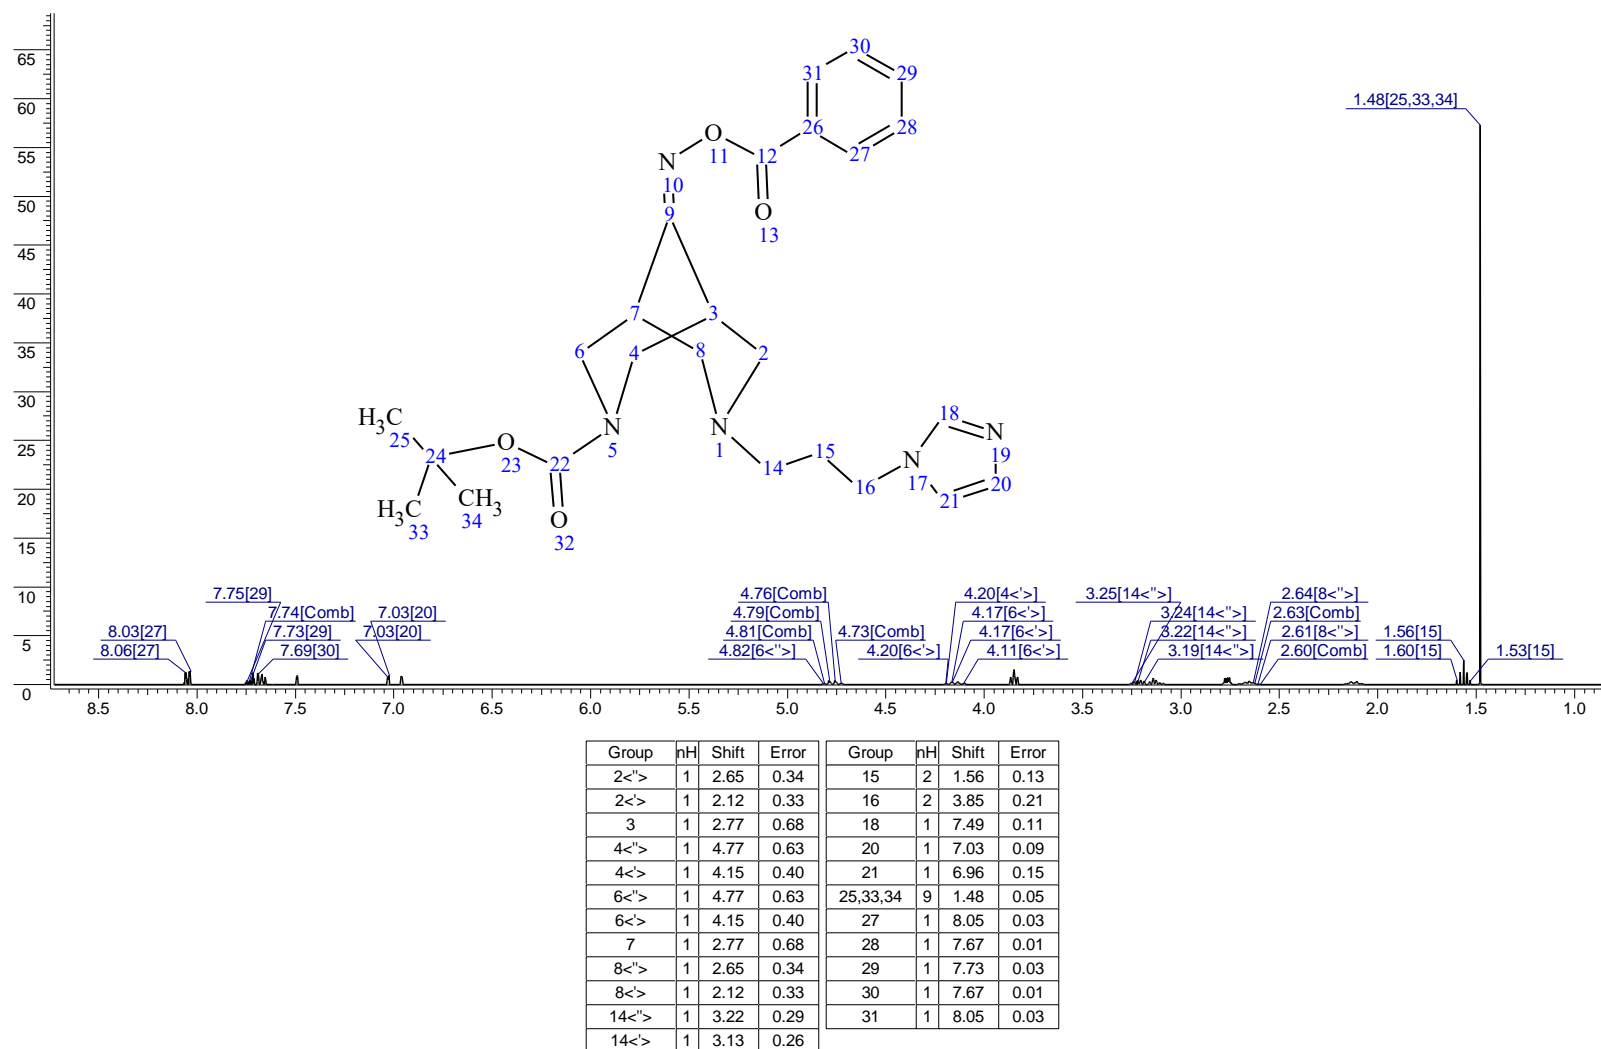

**Figure S18.**  $^1\text{H}$  NMR spectrum of O-benzoyloxime of 3-(3-Boc)-7-[3-(1H-imidazol-1-yl)propyl]-3,7-diazabicyclo[3.3.1]nonan-9-one (6a) in DMSO

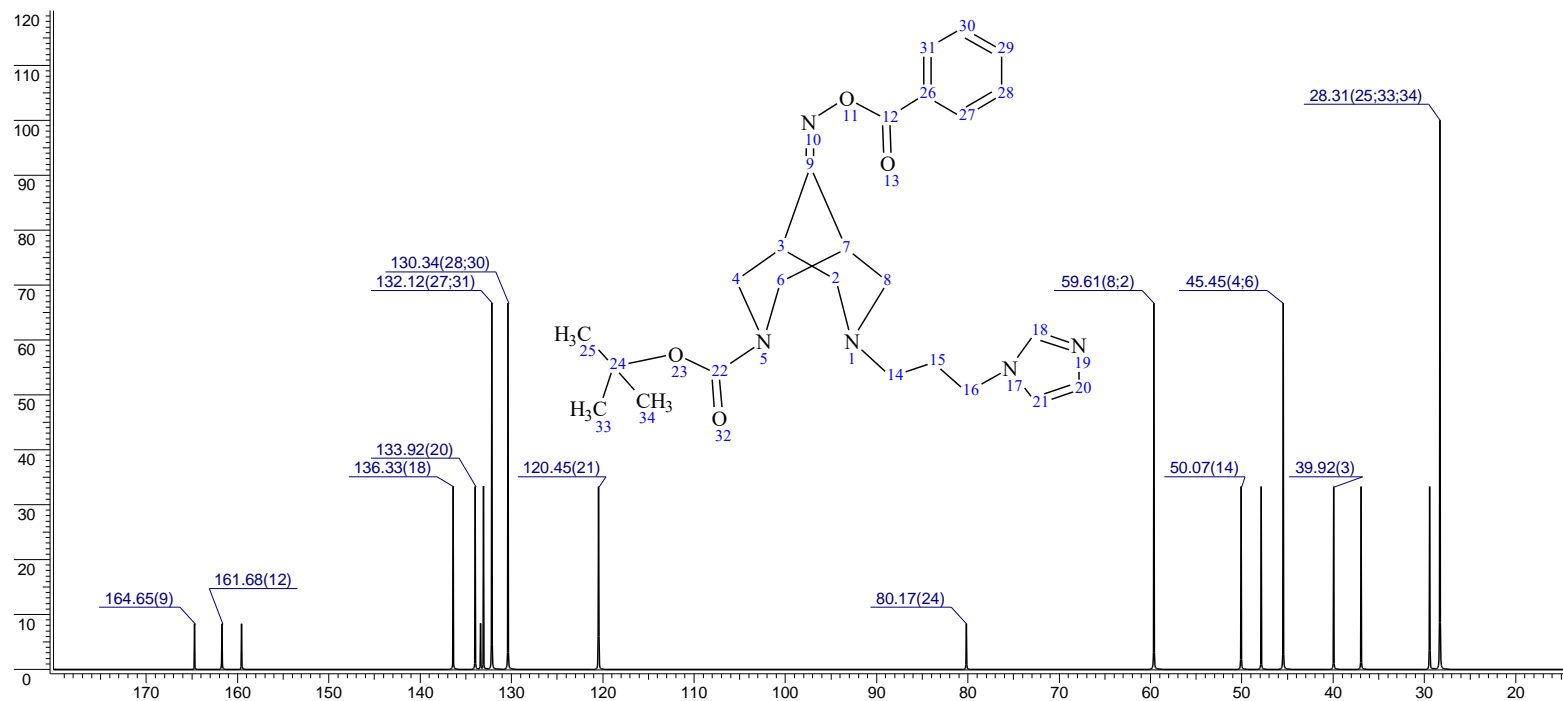

| Carbon No. | CHn             | Chem. Shifts | Conf. Limits | Carbon No. | CHn             | Chem. Shifts | Conf. Limits |
|------------|-----------------|--------------|--------------|------------|-----------------|--------------|--------------|
| 2          | CH <sub>2</sub> | 59.61        | 2.4          | 21         | CH              | 120.45       | 2            |
| 3          | CH              | 39.92        | 8.7          | 22         | C               | 159.52       | 2.7          |
| 4          | CH <sub>2</sub> | 45.45        | 5.3          | 24         | C               | 80.17        | 1            |
| 6          | CH <sub>2</sub> | 45.45        | 5.3          | 25         | CH <sub>3</sub> | 28.31        | 1            |
| 7          | CH              | 36.92        | 8.7          | 26         | C               | 133.35       | ---          |
| 8          | CH <sub>2</sub> | 59.61        | 2.4          | 27         | CH              | 132.12       | 1.5          |
| 9          | C               | 164.65       | 1.5          | 28         | CH              | 130.34       | 0.7          |
| 12         | C               | 161.68       | 0.3          | 29         | CH              | 133          | 1.2          |
| 14         | CH <sub>2</sub> | 50.07        | 4.3          | 30         | CH              | 130.34       | 0.7          |
| 15         | CH <sub>2</sub> | 29.44        | 2.3          | 31         | CH              | 132.12       | 1.5          |
| 16         | CH <sub>2</sub> | 47.85        | 4.7          | 33         | CH <sub>3</sub> | 28.31        | 1            |
| 18         | CH              | 136.33       | 2            | 34         | CH <sub>3</sub> | 28.31        | 1            |
| 20         | CH              | 133.92       | 1.5          |            |                 |              |              |

**Figure S19.**  $^{13}\text{C}$  NMR spectrum O-benzoyloxime of 3-(3-Boc)-7-[3-(1*H*-imidazol-1-yl)propyl]-3,7-diazabicyclo[3.3.1]nonan-9-one (6a)\_in\_DMSO

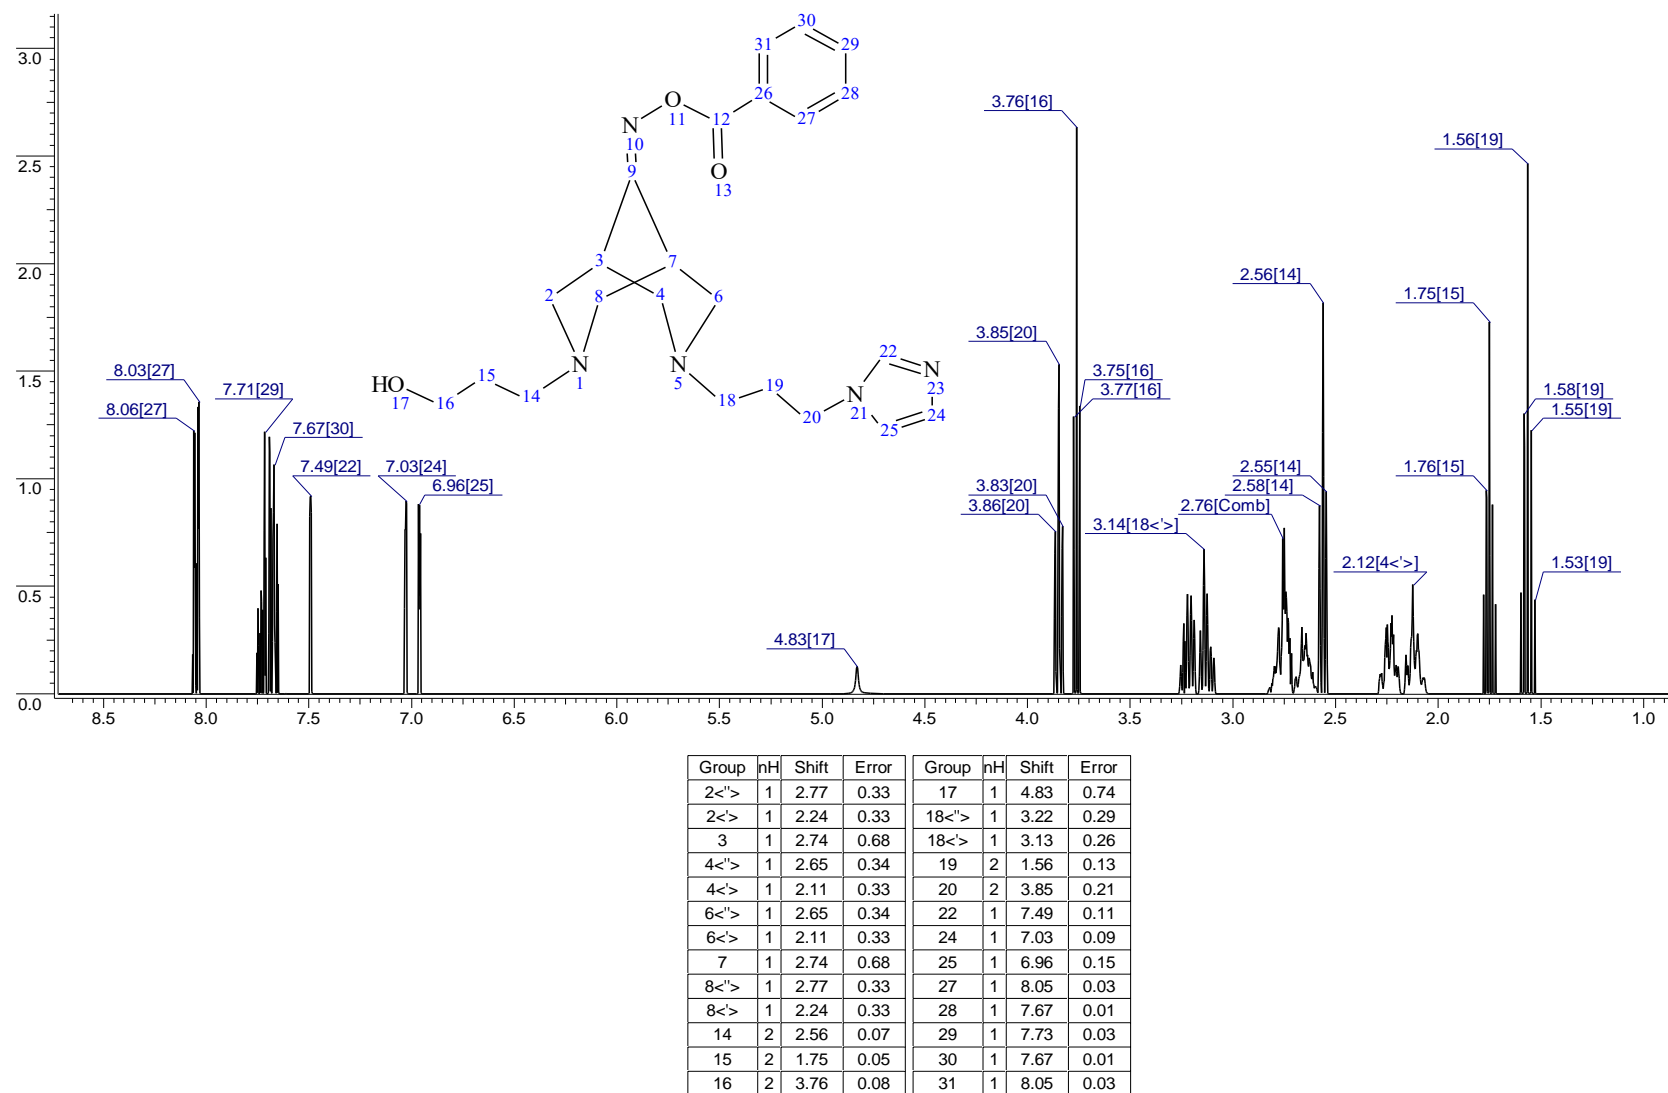

**Figure S20.** <sup>1</sup>H NMR spectrum of O-benzoyloxime of 3-(3-hydroxypropyl)-7-[3-(1H-imidazol-1-yl)propyl]-3,7-diazabicyclo[3.3.1]nonan-9-one (6b)\_in\_CHCl<sub>3</sub>

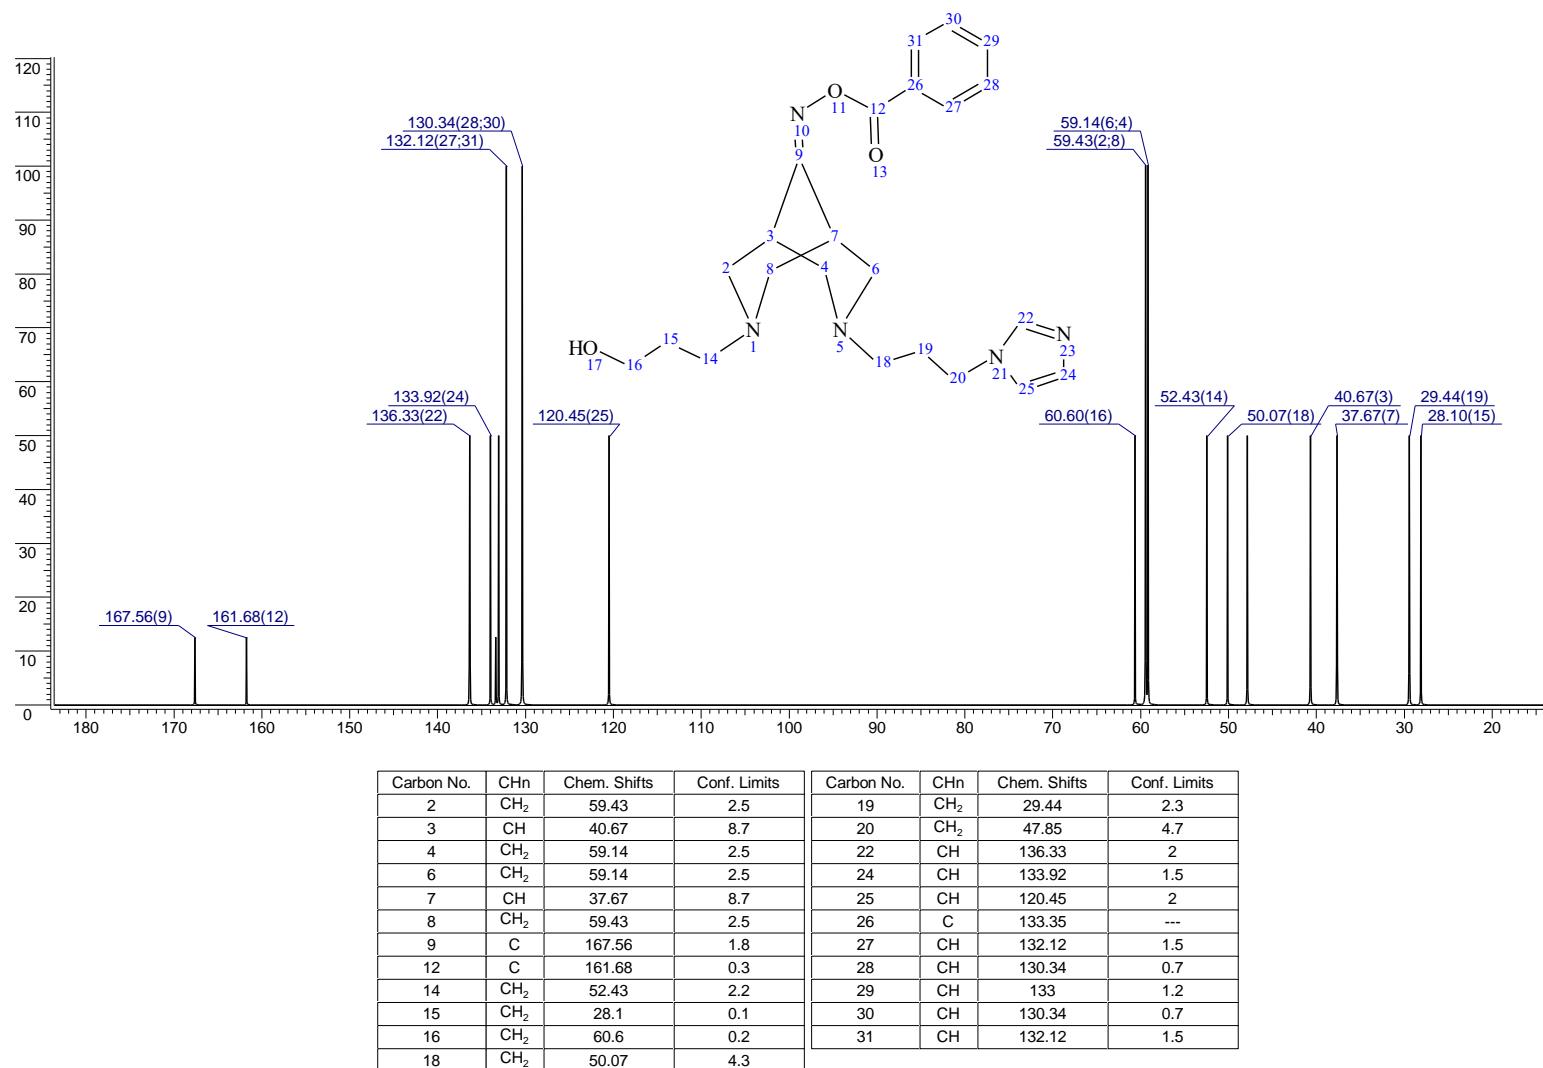

**Figure S21.** <sup>13</sup>C NMR spectrum of O-benzoyloxime of 3-(3-hydroxypropyl)-7-[3-(1H-imidazol-1-yl)propyl]-3,7-diazabicyclo[3.3.1]nonan-9-one (6b)\_in\_CHCl<sub>3</sub>
